# Supplementary material for: Genome-Wide Association Study Reveals Genetic Architecture and Candidate Genes for Yield and Related Traits under Terminal Drought, Combined Heat and Drought in Tropical Maize Germplasm
Source: MDPI journal article supplement (doi:10.3390/genes13020349), 2022-02-15
Supplement: s1 [file s1]

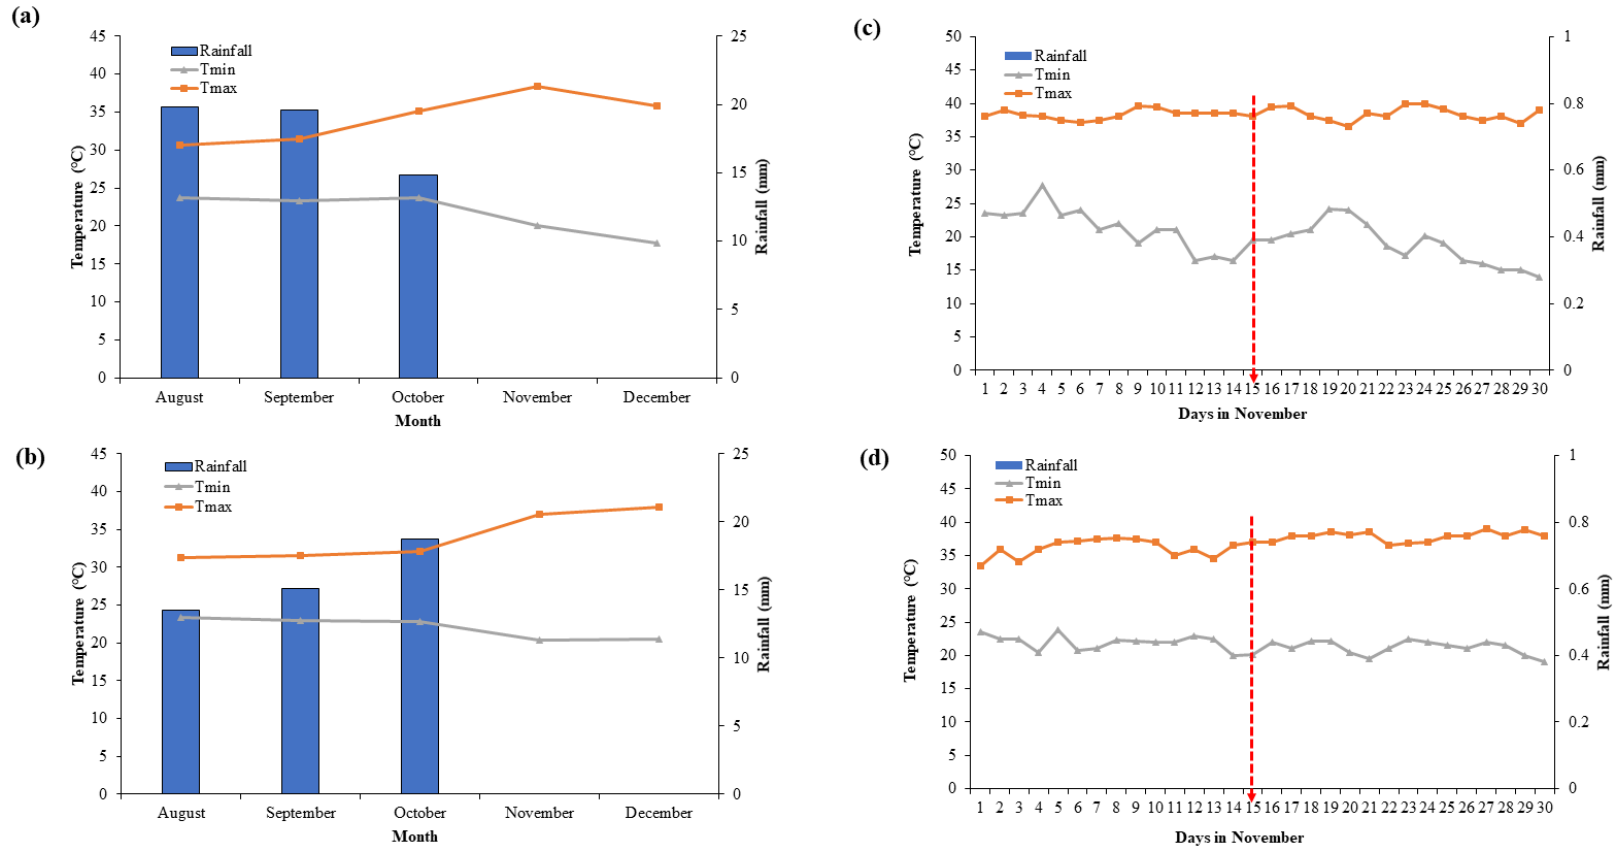

Supplementary Figure S2. Rainfall and temperature readings in Manga during the terminal drought season for the 2018 and 2019 cropping season. **(a)**. Manga, Ghana in 2018. **(b)**. Manga, Ghana in 2019. **(c)**. Daily rainfall and temperature readings in Manga 2018 prior and during tasseling. **(d)**. Daily rainfall and temperature readings in Manga 2019 prior and during tasseling. The red dotted line in c and d represent tasseling initiation time. Tmin = Minimum Temperature, Tmax. = Maximum Temperature, °C = Degrees Celsius
