# Supplementary material for: Genome-Wide Association Study Reveals Genetic Architecture and Candidate Genes for Yield and Related Traits under Terminal Drought, Combined Heat and Drought in Tropical Maize Germplasm
Source: MDPI journal article supplement (doi:10.3390/genes13020349), 2022-02-15
Supplement: s1 [file s1]

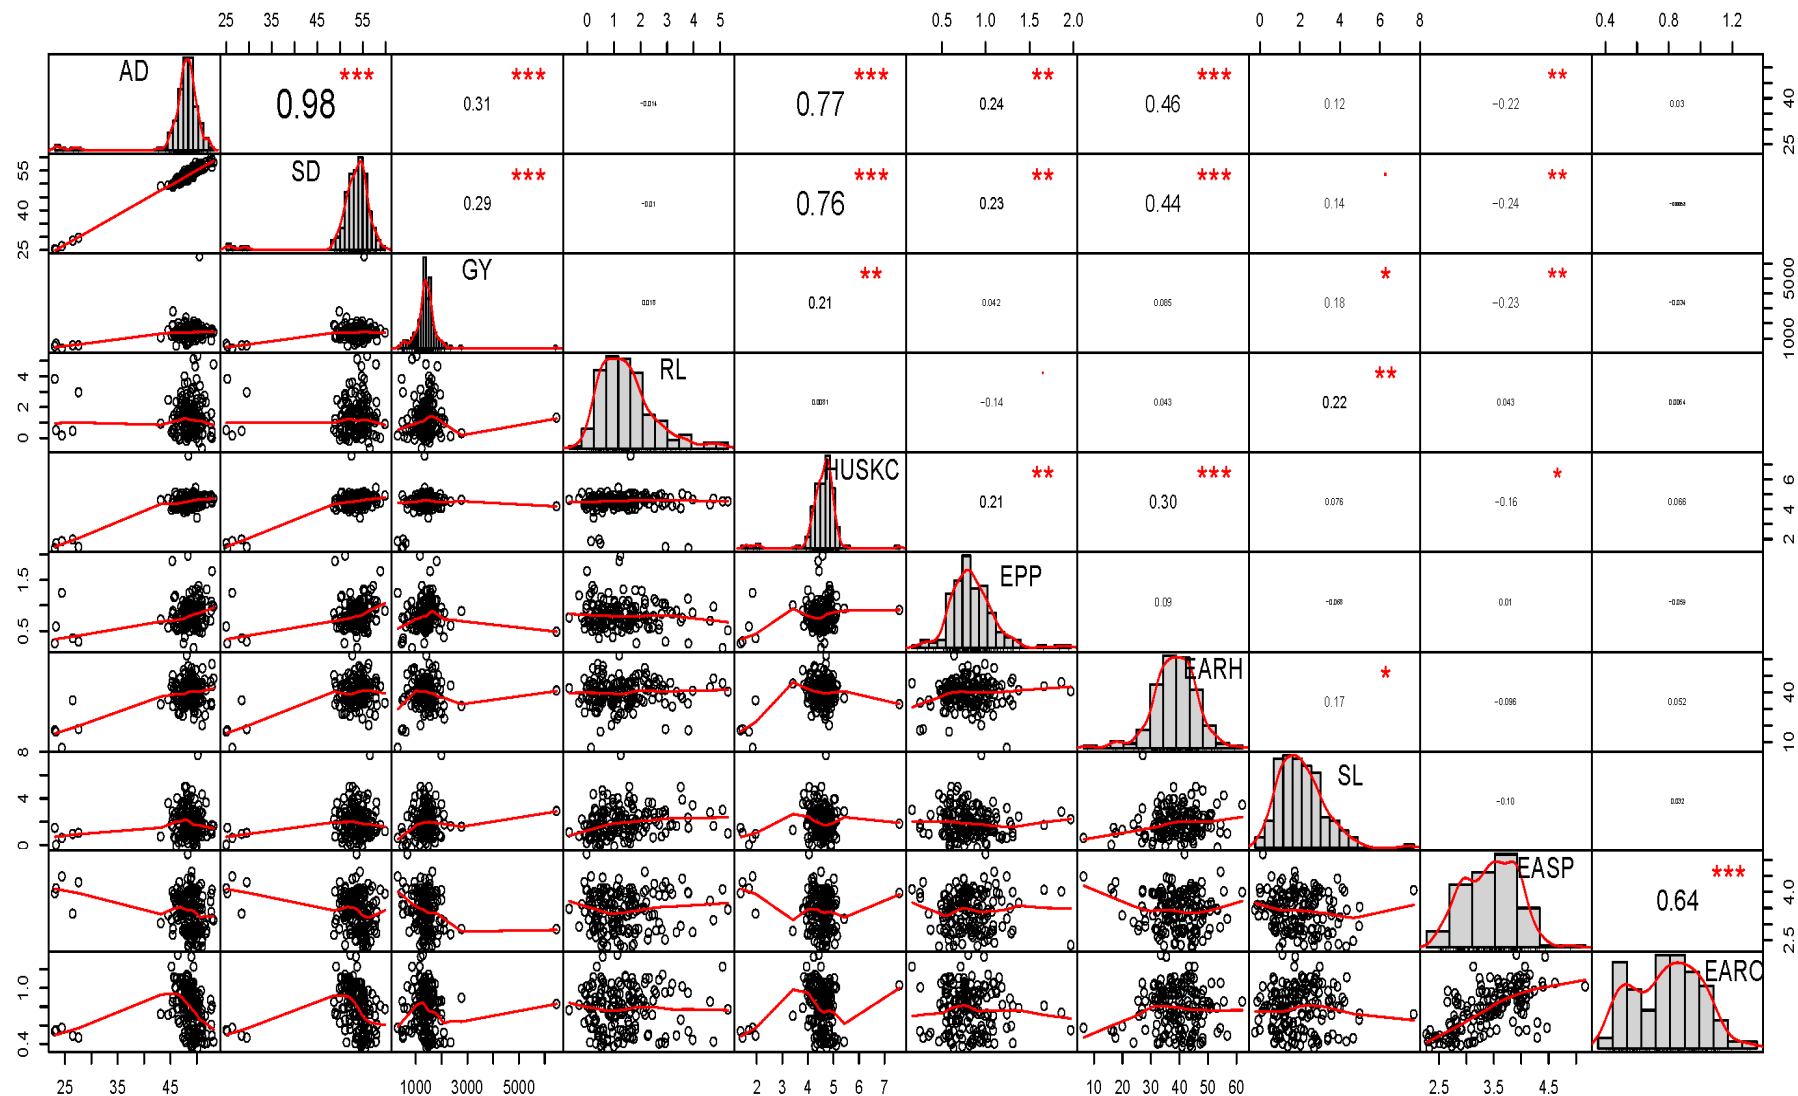

Supplementary Figure S4: Correlation analysis of traits evaluated across the combined heat and drought conditions with average values from Manga (Ghana) and Kadawa (Nigeria). \*, \*\* and \*\*\* are significant correlation at  $p < 0.05$ ,  $p < 0.01$ ,  $p < 0.001$ , respectively. Days to 50% anthesis (AD); days to 50% silking (SD); grain yield (GY); stalk lodging (SL); ear aspect (EASP); Ear rot (EARO); leaf firing (LF); tassel blasting (TB); ear per plant (EPP) and leaf death (LD).
