# Supplementary material for: Genome-Wide Association Study Reveals Genetic Architecture and Candidate Genes for Yield and Related Traits under Terminal Drought, Combined Heat and Drought in Tropical Maize Germplasm
Source: MDPI journal article supplement (doi:10.3390/genes13020349), 2022-02-15
Supplement: s1 [file s1]

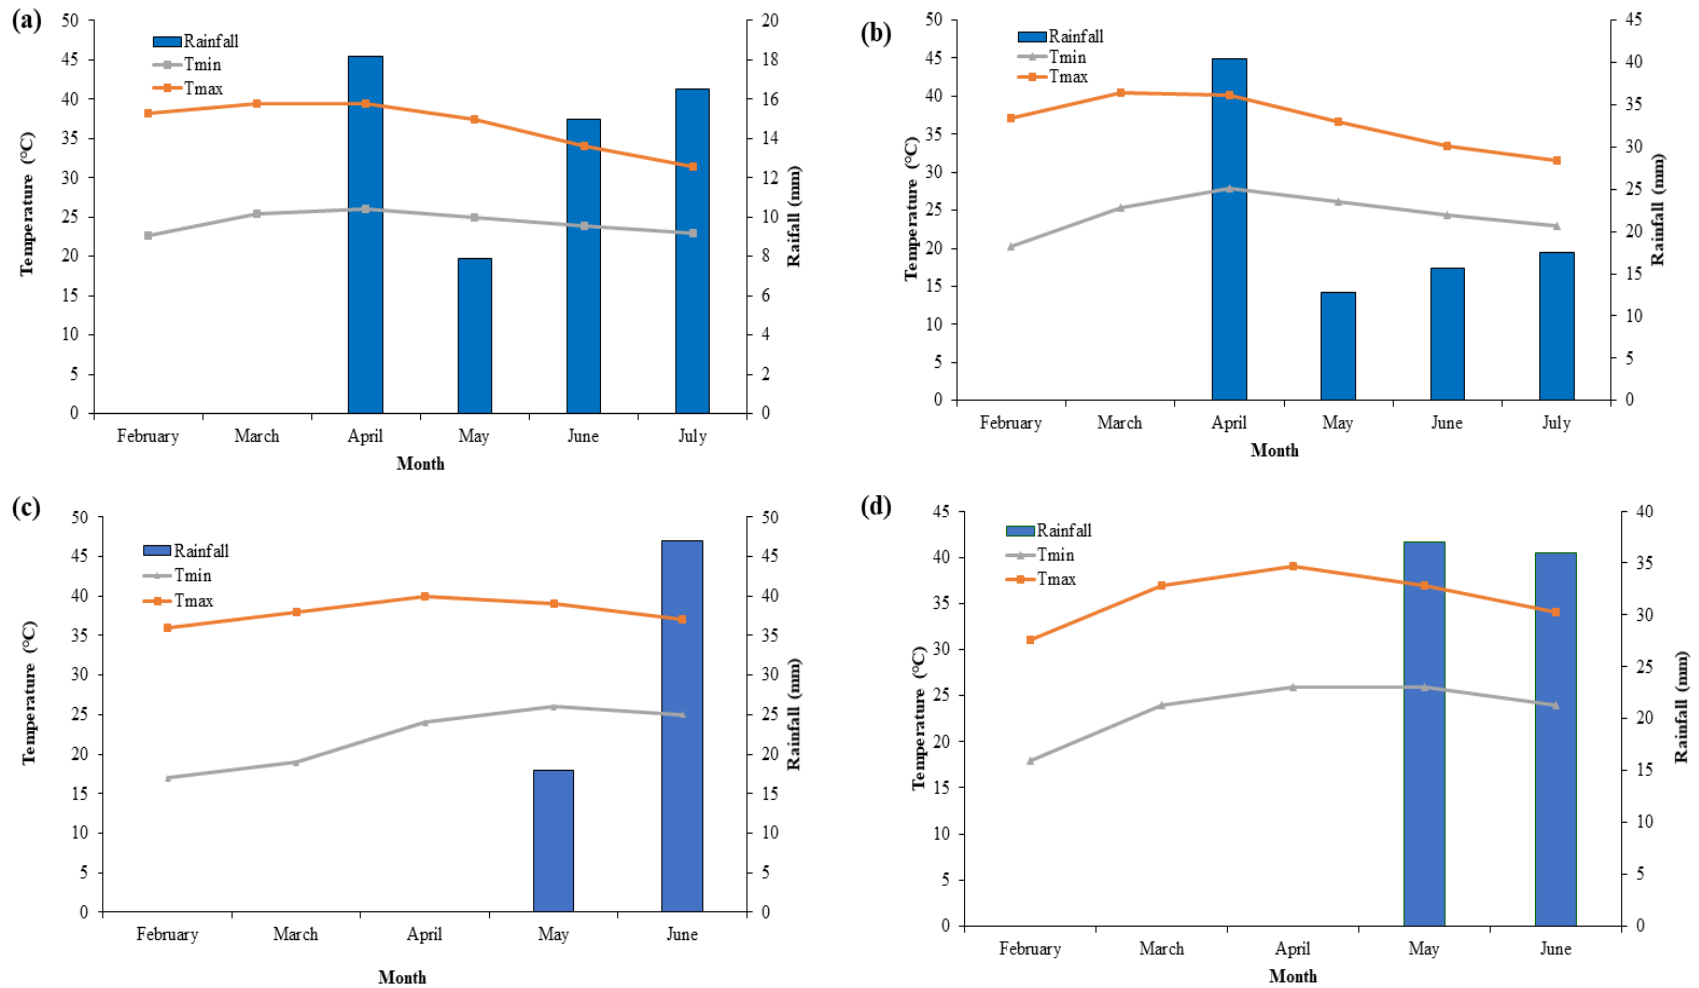

Supplementary Figure S1. Average rainfall and temperature in the two locations during the 2018 and 2019 cropping seasons. **(a).** Manga, Ghana in 2018. **(b).** Manga, Ghana in 2019. **(c).** Kadawa, Nigeria in 2018. **(d).** Kadawa, Nigeria in 2019. Tmin = Minimum Temperature, Tmax. = Maximum Temperature, °C = Degrees Celsius
