# Supplementary material for: Genome-Wide Association Study Reveals Genetic Architecture and Candidate Genes for Yield and Related Traits under Terminal Drought, Combined Heat and Drought in Tropical Maize Germplasm
Source: Genes (Basel). 2022 Feb 15;13(2):349. doi: 10.3390/genes13020349 (PMC8871853; doi:10.3390/genes13020349)
Supplement: Supplementary file 1 [file genes-13-00349-s001.zip]

Archive with 9 entries (9 files):
- Supplementary Fig S1.pdf
- Supplementary Fig S2.pdf
- Supplementary Fig S3.pdf
- Supplementary Fig S4.pdf
- Supplementary Fig S5.pdf
- Supplementary Table    S1.xlsx
- Supplementary Table    S2.xlsx
- Supplementary Table    S3.xlsx
- Supplementary Table    S4.xlsx
