# Supplementary material for: Genome-Wide Association Study Reveals Genetic Architecture and Candidate Genes for Yield and Related Traits under Terminal Drought, Combined Heat and Drought in Tropical Maize Germplasm
Source: Genes (Basel). 2022 Feb 15;13(2):349. doi: 10.3390/genes13020349 (PMC8871853; doi:10.3390/genes13020349)
Supplement: Supplementary file 1 [file genes-13-00349-s001.zip › Supplementary Table S1.xlsx]

## Sheet: Table S1a
Supplementary Table S1a: Descritpive statistics of combined heat and drought experiments conducted in 2018 and 2019 in Manga (Ghana) and Kadawa (Nigeria)
Statistics	AD	SD	ASI	GY	PLTH	RL	HUSKC	PLASP	EASP	EAROT	LF	TB	EPP	LD
Number of values	161	161	162	162	162	162	162	162	162	162	162	162	161	162
Minimum	48.16	49.28	-1.96	94.24	55.46	-0.1967	1.498	1.765	3.191	-0.02369	-0.1498	-0.1256	0.07023	1.071
Maximum	75.73	77.73	3.005	1684	147.9	1.419	4.892	6.048	8.172	0.1177	1.403	0.7697	1.472	3.826
Mean	66.85	67.66	0.7932	623.6	88.79	0.157	3.102	4.582	5.952	0.003152	0.08303	0.04474	0.6054	2.172
Std. Deviation	3.356	3.47	0.8756	304.9	12.3	0.2275	0.603	0.6871	0.9196	0.01546	0.1798	0.1199	0.2018	0.4581
Std. Error of Mean	0.2645	0.2734	0.06879	23.95	0.9661	0.01787	0.04737	0.05398	0.07225	0.001214	0.01412	0.009421	0.0159	0.03599
Skewness	-1.499	-1.227	-0.1248	1.291	0.8979	2.65	0.2596	-0.9672	-0.5517	4.167	3.277	2.734	0.4752	0.8306
Kurtosis	7.192	6.2	0.5919	2.075	2.855	11.2	0.7086	1.929	0.426	23.86	18.38	10.49	2.313	1.378
Traits evaluated days to 50 % anthesis (AD), days to 50 % silking (SD), anthesis silking interval (ASI), stalk lodging (SL), husk cover (HUSKC), plant aspect (PLASP), leaf death (LD), plant height (PLTH), root lodging (RL), ear rot (EARO), ear aspect (EASP), ears per plant (EPP), tassel blasting (TB), leaf firing (LF) and grain yield (GY)

## Sheet: Table S1b
Supplementary Table S1b: Descritpive statistics of terminal drought experiments conducted in 2018 and 2019 in Manga (Ghana)
Statistics	AD	SD	SL	RL	HUSKC	EPP	EARH	EASP	EAROT	GY
Number of values	162	162	162	162	162	162	162	162	162	162
Minimum	23.13	25.09	-0.2354	-0.6766	1.38	0.1617	6.409	2.274	0.3543	310.4
Maximum	53.22	59.91	7.692	5.299	7.587	1.973	62.12	5.171	1.354	6464
Mean	48.09	52.97	1.953	1.336	4.48	0.8136	39.4	3.418	0.775	1406
Std. Deviation	4.483	5.137	1.2	1.096	0.6379	0.2614	8.062	0.5701	0.23	530.7
Std. Error of Mean	0.3522	0.4036	0.09431	0.08608	0.05012	0.02054	0.6334	0.04479	0.01807	41.7
Skewness	-4.284	-4.038	1.005	1.18	-1.968	1.08	-0.6054	8.494e-05	0.001362	5.35
Kurtosis	20.43	18.76	2.414	1.691	13.34	3.549	1.829	-0.549	-0.8271	51.12
Traits evaluated days to 50 % anthesis (AD), days to 50 % silking (SD), stalk lodging (SL), , root lodging (RL), husk cover (HUSKC), , ears per plant (EPP), ear height (EARH), ear aspect (EASP), ear rot (EARO) and grain yield (GY)
