# Supplementary material for: Genome-Wide Association Study Reveals Genetic Architecture and Candidate Genes for Yield and Related Traits under Terminal Drought, Combined Heat and Drought in Tropical Maize Germplasm
Source: Genes (Basel). 2022 Feb 15;13(2):349. doi: 10.3390/genes13020349 (PMC8871853; doi:10.3390/genes13020349)
Supplement: Supplementary file 1 [file genes-13-00349-s001.zip › Supplementary Table S2.xlsx]

## Sheet: Table S2a
Table S2a. Mean square and heritability estimates of the 162 inbred lines assessed under CHD conditions at Manga in Ghana and Nigeria during the 2017/2018 and 2018/2019 dry seasons
Source	a DF	b GY	c AD	d SD	e ASI	f PLHT	g EARHT	h RL	i SL	j HUSKC	k PLASP	l EASP	m EROT	n LD	o EPP	p LF	q TB
1 Env.	1	35727063.43 ***	112.02	7.33	180.5 ***	87292.34 ***	174345.12 ***	0.05	1.05 ***	1949.65 ***	1.29	1225.12 ***	9e-05	643.11 ***	56.40 ***	0.22 **	0.01
2 Rep (Env)	2	1531832.09 ***	2.32	61.21	42.15 ***	165.9	482.79 ***	0.06	0.08	2.78 **	35.40 ***	38.53 ***	0.0005	29.50 ***	2.06 ***	0.09	0.01
Block (Env*Rep)	68	173559.02 ***	66.86 ***	66.87 ***	2.32 ***	309.34 ***	88.48 ***	0.11	0.04	1.52 ***	2.16 ***	3.72 ***	0.0008	0.73 ***	0.15 **	0.04	0.02
Entry	161	323181.13 ***	35.54	38.94	2.40 ***	520.05 ***	124.60 ***	0.16 ***	0.07 ***	1.23 ***	1.65 **	2.88 ***	0.0008	0.733 ***	0.14 **	0.100 ***	0.04 ***
Env*Entry	161	300788.26 ***	36.63	38.87	2.58 ***	344.46 ***	101.86 ***	0.16 ***	0.05	1.15 ***	1.72 ***	3.20 ***	0.0007	0.66 ***	0.14 **	0.08 ***	0.04 ***
Error	254	105521	33.76	35.41	1.36	135.57	42.99	0.09	0.04	0.73	1.17	1.34	0.0007	0.39	0.1	0.04	0.02
Heritability	-	57	17	14	60	45	28	4.7	16	82	71	71	13	66	62	39	42
*,**,*** = significant at p < 0.05, 0.01 and 0.001, respectively; a degrees of freedom; 1 environment; 2 replication; b Grain yield, c days to 50% anthesis; d days to 50% silking; e anthesis silking interval; f plant height; g ear height; h root lodging; i stalk lodging; j husk cover; k plant aspect; l ear aspect m ear rot; nl eaf death; o = ear per plant; p leaf firing; q tassel blasting.

## Sheet: Table S2b
Table S2b. Mean square estimates and heritability of the 162 inbred lines assessed under terminal drought conditions in Ghana (Manga) during the 2017/2018 and 2018/2019 dry seasons
Source	a DF	b GY	c AD	d SD	e ASI	f PLHT	g EARHT	h RL	i SL	j HUSKC	k PLASP	l EASP	m EROT	n LD	o EPP
1 Env.	1	21573948.5 ***	1816.70 ***	910.22 ***	155.07 ***	204698.04 ***	10798.76 ***	743.26 ***	595.05 ***	475.34 ***	179.44 ***	23.45 ***	35.97 ***	114.53 ***	7.51 ***
2 Rep (Env)	2	578428	952.39 ***	1255.53 ***	21.61 ***	38740.288 ***	7929.19 ***	6.47 *	47.64 ***	110.40 ***	61.48 ***	50.65 ***	0.51 ***	23.83 ***	2.54 ***
Block(Env*Rep)	68	786725	6.50 ***	7.87 ***	2.52	1195.53	100.68 ***	2.59	3.23	0.59 ***	0.90 ***	1.32 ***	0.14 ***	0.58	0.19
Entry	161	896514	70.31 ***	91.98 ***	3.79 ***	1763.36 ***	202.40 ***	3.90 ***	4.54 *	1.36 ***	0.38	1.04 *	0.16 ***	0.96 ***	0.22
Env*Entry	161	939302	66.98 ***	80.27 ***	3.13 **	1387.08 *	102.27 ***	3.24 ***	4.29	1.19 ***	0.37	1.42 ***	0.16 ***	0.80 ***	0.23
Error	254	757340	3.89	4.86	2.31	1075.27	60.17	1.97	3.58	0.38	0.34	0.81	0.05	0.52	0.24
Heritability	---	56	53	50	60	45	28	21	24	82	71	74	12	54	54
*,**,*** = significant at p < 0.05, 0.01 and 0.001, respectively; a degrees of freedom; 1 environment; 2 replication; b Grain yield, c days to 50% anthesis; d days to 50% silking; e anthesis silking interval; f plant height; g ear height; h root lodging; i stalk lodging; j husk cover; k plant aspect; l ear aspect; m ear rot; n leaf death; o = ear per plant.

## Sheet: Table S2c
Table S2c. Mean squares and heritability estimates of 162 inbred lines assessed across terminal drought and CHD environments in Nigeria and Ghana, during the dry seasons of 2017/ 2018 and 2018/2019
Source	a DF	b GY	c AD	d SD	e ASI	f PLHT	g EARHT	h RL	i SL	j HUSKC	k PLASP	l EASP	m EROT	n LD	o EPP
1Env.	3	85290413 ***	38008.2 ***	23182.26 ***	1913.96 ***	109302.75 ***	64914.97 ***	398.01 ***	564.72 ***	1013.43 ***	88.94 ***	1105.15 ***	75.45 ***	401.1 ***	26.14 ***
2Rep(Env)	4	1055130.3 *	477.36 ***	658.76 ***	31.88 ***	19453.09 ***	4205.99 ***	3.27 **	23.86 ***	56.59 ***	48.44 ***	44.59 ***	0.25 ***	26.66 ***	13.31 ***
Block(Env*Rep)	136	480102	36.68 ***	37.37 ***	2.42 **	752.43 *	94.58 ***	1.35 **	1.63	1.91 ***	1.53 ***	2.33 ***	0.07 ***	0.65 ***	0.17
Entry	161	650144.1 ***	53.24 ***	65.47 ***	3.24 ***	1328.82 ***	224.75 ***	2.04 ***	2.35 **	1.14 ***	0.91	1.77 ***	0.08 ***	0.95 ***	0.17
Env*Entry	480	603674.1 ***	50.35 ***	59.74 ***	2.97 ***	877.63 ***	102.04 ***	1.77 ***	2.30 ***	1.23 ***	1.04 ***	2.22 ***	0.08 ***	0.74 ***	0.18
Error	502	431431	18.65	19.95	1.83	604.49	51.51	1.03	1.8	0.55	0.76	1.08	0.02	0.45	0.17
Heritability		58	47	39	57	34	29	24	17	62	54	65	23	61	49
*,**,*** = significant at P< 0.05, 0.01 and 0.001, respectively; a degrees of freedom; 1 environment; 2 replication; b Grain yield, c days to 50% anthesis; d days to 50% silking; e anthesis silking interval; f plant height; g ear height; h root lodging; i stalk lodging; j husk cover; k plant aspect; l ear aspect; m ear rot; n leaf death; o = ear per plant.
