# Supplementary material for: Genome-Wide Association Study Reveals Genetic Architecture and Candidate Genes for Yield and Related Traits under Terminal Drought, Combined Heat and Drought in Tropical Maize Germplasm
Source: Genes (Basel). 2022 Feb 15;13(2):349. doi: 10.3390/genes13020349 (PMC8871853; doi:10.3390/genes13020349)
Supplement: Supplementary file 1 [file genes-13-00349-s001.zip › Supplementary Table S3.xlsx]

## Sheet: Table S3
Supplementary Table S3: SNPs associated with the 15 traits evaluated under combined heat and drought condition
Marker a	Chr. b	Pos. c	AD	SD	ASI	SL	HUSKC	PLASP	LD	PLTH	RL	EARO	EASP	EPP	TB	LF	GY
SNP_61665276	1	61665276	-	-	-	15.37(47.10)	-	-	-	-	-	-	-	-	-	-	-
SNP_81895008	1	81895008	-	-	-	-	-	-	-	-	-	-	-	-	-	-	5.46 (18.76)
SNP_82684770	1	82684770	-	-	-	-	-	-	-	-	-	-	-	-	-	-	4.21(13.85)
SNP_117651671	1	117651671	-	-	-	-	-	-	-	-	-	-	-	-	-	-	-
SNP_161703060	1	161703060	4.17 (14.58)	4.30(15.08)	-	-	-	-	-	-	-	-	-	-	-	-	-
SNP_191586907	1	191586907	-	-	-	-	-	-	-	-	-	-	-	-	-	-	-
SNP_191639404	1	191639404	-	-	-	-	-	-	-	4.29(14.75)	5.63(19.12)	-	-	-	-	-	-
SNP_198775501	1	198775501	-	-	-	15.37(47.10)	-	-	-	-	-	-	-	-	-	-	-
SNP_199515405	1	199515405	-	-	-	15.21(48.89)	-	-	-	-	-	-	-	-	-	-	-
SNP_242210520	1	242210520	-	-	-	-	4.62(15.73)	-	-	-	-	-	-	-	-	-	-
SNP_243027755	1	243027755	-	-	-	15.37(47.10)	-	-	-	-	-	-	-	-	-	-	-
SNP_245573979	1	245573979	-	-	-	-	-	-	-	-	-	-	3.95 (13.99)	-	-	-	-
SNP_290790231	1	290790231	-	-	-	-	-	-	-	4.29(14.75)	-	-	-	-	-	-	-
SNP_1805602	2	1805602	-	-	-	-	-	-	-	-	-	-	-	-	-	-	-
SNP_11473743	2	11473743	3.93(13.52)	-	-	-	-	-	-	-	-	-	-	-	-	-	-
SNP_18184380	2	18184380	-	-	-	-	-	-	-	-	4.16(13.93)	-	-	-	-	-	-
SNP_30387754	2	30387754	-	-	-	11.73(38.03)	-	-	-	-	-	-	-	-	-	-	-
SNP_42619227	2	42619227	-	-	-	-	-	-	-	-	-	-	-	-	-	-	4.06(13.34)
SNP_56993417	2	56993417	-	-	-	-	-	-	-	-	-	-	-	-	-	-	-
SNP_93284000	2	93284000	-	-	-	-	-	-	-	5.15(17.74)	-	-	-	-	-	4.11(13.95)	-
SNP_196800695	2	196800695	7.42(26.48)	-	-	-	-	-	-	-	5.15(17.60)	-	-	-	-	-	-
SNP_199419350	2	199419350	-	-	-	-	-	-	-	-	-	-	-	-	-	-	-
SNP_6825039	3	6825039	-	-	-	-	-	-	-	-	-	-	-	-	-	-	4.25(15.14)
SNP_97975585	3	97975585	-	-	-	15.26(47.13)	-	-	-	-	-	-	-	-	-	-	-
SNP_143903954	3	143903954	-	-	-	-	-	-	-	-	-	-	-	-	-	-	4.32(16.53)
SNP_199390515	3	199390515	-	(4.36)14.62	-	-	-	-	-	-	4.36(14.62)	-	-	-	-	-	-
SNP_215851375	3	215851375	-	4.35(14.60)	-	-	-	-	-	-	4.35(14.60)	-	-	-	-	-	-
SNP_32023409	4	32023409	-	-	-	15.55(47.90)	-	-	-	-	-	-	-	-	-	-	-
SNP_42991074	4	42991074	-	-	-	-	-	-	-	-	-	-	-	-	-	-	4.085(14.38)
SNP_49826316	4	49826316	-	-	-	-	-	-	-	-	-	-	-	-	-	-	4.265(15.31)
SNP_84602389	4	84602389	-	-	-	-	-	-	-	-	-	-	-	3.92(10.96)	-	-	-
SNP_166466778	4	166466778	-	-	-	-	-	-	-	-	-	-	-	3.91(8.37)	-	-	-
SNP_168609387	4	168609387	-	-	-	-	-	-	-	-	-	-	-	-	-	-	4.005(13.70)
SNP_170036516	4	170036516	-	-	-	-	-	-	-	-	-	8.23(27.82)	-	-	-	-	-
SNP_208903615	4	208903615	-	-	-	15.25(49.22)	-	-	-	-	-	-	-	-	-	-	-
SNP_213750918	4	213750918	-	-	-	-	-	-	-	-	-	-	-	-	-	-	4.125(14.20)
SNP_231684692	4	231684692	-	-	-	-	-	-	-	-	-	-	-	-	-	-	4.425(15.26)
SNP_66771633	5	66771633	-	-	-	-	-	-	3.94(13.99)	-	-	-	-	-	-	-	-
SNP_193737891	5	193737891	-	-	-	-	-	-	-	-	-	-	-	-	-	-	4.14(13.64)
SNP_195454836	5	195454836	7.64(25.60)	-	-	-	-	-	-	-	-	-	-	-	-	4.84(16.43)	4.14(15.09)
SNP_210998639	5	210998639	-	7.14(23.94)	-	-	-	-	-	-	-	-	-	-	-	-	-
SNP_221804675	5	221804675	-	-	-	-	-	-	-	-	-	-	-	-	-	-	-
SNP_96574803	6	96574803	-	-	-	-	-	-	-	-	9.64(31.35)	-	-	-	-	-	-
SNP_113969815	6	113969815	-	-	-	-	-	-	-	-	4.30(15.35)	-	-	-	-	-	-
SNP_126299404	6	126299404	-	-	-	-	-	-	-	-	6.33(21.35)	-	-	-	-	-	-
SNP_140349538	6	140349538	-	-	-	-	-	-	-	4.98(17.35)	-	-	-	-	-	-	-
SNP_149975392	6	149975392	-	-	-	-	-	-	-	-	4.57(15.35)	-	-	-	-	-	-
SNP_51772182	7	51772182	-	-	-	-	-	4.44(15.85)	-	-	-	-	4.28(14.85)	-	-	-	-
SNP_150654454	7	150654454	-	-	-	4.34(14.85)	-	-	-	-	-	-	-	-	-	-	-
SNP_157220656	7	157220656	-	-	-	4.45(16.85)	-	-	-	-	-	-	-	-	-	-	-
SNP_159789919	7	159789919	-	-	-	4.12(14.85)	-	-	-	-	-	-	-	-	-	-	-
SNP_176529707	7	176529707	-	-	-	15.22(47.85)	-	-	-	-	-	-	-	-	-	-	-
SNP_179614810	7	179614810	-	-	4.00(13.85)	-	-	-	-	-	-	-	-	-	-	-	-
SNP_178280725	8	178280725	-	-	-	-	-	-	-	-	-	4.90(17.27)	-	-	-	-	-
SNP_22059270	9	22059270	-	-	-	-	-	-	-	-	-	-	-	-	-	-	4.30(14.47)
SNP_25065840	9	25065840	-	-	3.39(13.86)	-	-	-	-	-	-	-	-	-	-	-	-
SNP_96781306	9	96781306	-	-	-	-	-	-	-	-	-	-	-	-	6.71(24.27)	-	-
SNP_118804947	9	118804947	-	-	-	-	-	-	-	-	-	4.20(14.31)	-	-	-	-	-
SNP_125819532	9	125819532	-	-	-	-	-	-	-	-	-	5.46(19.95)	-	-	-	-	-
SNP_150282902	9	150282902	-	-	-	-	-	-	-	-	-	-	-	-	6.80(25.21)	-	-
SNP_154980066	9	154980066	-	-	-	-	-	-	4.57(15.73)	-	-	-	-	-	-	-	-
SNP_158056460	9	158056460	-	-	-	-	-	-	4.10(14.16)	-	-	-	-	-	-	-	-
SNP_103783517	10	103783517	-	-	-	-	-	-	-	-	-	-	-	-	-	-	4.28(15.58)
SNP_126092807	10	126092807	-	-	-	-	-	-	-	-	-	-	-	-	-	-	3.92(14.16)
SNP_126110026	10	126110026	-	-	-	4.28(14.83)	-	-	-	-	-	-	-	-	-	-	-
SNP_138707317	10	138707317	-	-	-	-	-	-	-	-	4.13(14.06)	-	-	-	-	-	-
a Marker names bolded are those markers detected simultaneously in combined heat and drought as well as the combination of this condition plus the terminal drought. b chromosome number. c Position of SNP. The value in cell under each trait represent peak vaule (phenotypic variaition explained by the marker). Traits evaluated days to 50 % anthesis (AD), days to 50 % silking (SD), anthesis silking …
