# Supplementary material for: Genome-Wide Association Study Reveals Genetic Architecture and Candidate Genes for Yield and Related Traits under Terminal Drought, Combined Heat and Drought in Tropical Maize Germplasm
Source: Genes (Basel). 2022 Feb 15;13(2):349. doi: 10.3390/genes13020349 (PMC8871853; doi:10.3390/genes13020349)
Supplement: Supplementary file 1 [file genes-13-00349-s001.zip › Supplementary Table S4.xlsx]

## Sheet: plantCARE_output_PlantCARE_1676
		Supplementary Table S4: Cis-acting regulating elements identified at 1.50 kb upstream of the start codon of the predicted candidate genes obtained from PlantCARE Database (those with red fonts have been reported to play in abiotic stress tolerance in crop plants
Gene	Transcription factor	Sequence	Start Position (bp)	Interval Position (bp)	Position (Forward (+) & Reverse (-))	Crop Species Identified/Validated	Function
Zm00001d002374	MYB	CAACCA	301	6	+	Arabidopsis thaliana
Zm00001d002374	MYB	CAACCA	358	6	+	Arabidopsis thaliana
Zm00001d002374	MYB	TAACCA	433	6	-	Arabidopsis thaliana
Zm00001d002374	MYB	TAACCA	1074	6	-	Arabidopsis thaliana
Zm00001d002374	ERE	ATTTTAAA	1083	8	+	Nicotiana glutinos
Zm00001d002374	WUN-motif	TAATTACTC	846	9	+	Nicotiana glutinosa
Zm00001d002374	WUN-motif	TTATTACAT	1142	9	+	Nicotiana glutinosa
Zm00001d002374	3-AF3 binding site	CACTATCTAAC	896	10	+	Pisum sativum	part of a conserved DNA module array (CMA3)
Zm00001d002374	W box	TTGACC	993	6	+	Arabidopsis thaliana
Zm00001d002374	W box	TTGACC	1208	6	+	Arabidopsis thaliana
Zm00001d002374	AT~TATA-box	TATATA	77	6	+	Arabidopsis thaliana
Zm00001d002374	AT~TATA-box	TATATA	79	6	+	Arabidopsis thaliana
Zm00001d002374	GT1-motif	GGTTAA	434	6	+	Arabidopsis thaliana	light responsive element
Zm00001d002374	G-box	CACGAC	677	6	-	Zea mays	cis-acting regulatory element involved in light responsiveness
Zm00001d002374	CAT-box	GCCACT	393	6	-	Arabidopsis thaliana	cis-acting regulatory element related to meristem expression
Zm00001d002374	ARE	AAACCA	33	6	+	Zea mays	cis-acting regulatory element essential for the anaerobic induction
Zm00001d002374	ARE	AAACCA	523	6	-	Zea mays	cis-acting regulatory element essential for the anaerobic induction
Zm00001d002374	ARE	AAACCA	648	6	+	Zea mays	cis-acting regulatory element essential for the anaerobic induction
Zm00001d002374	MYB-like sequence	TAACCA	433	6	-	Arabidopsis thaliana
Zm00001d002374	MYB-like sequence	TAACCA	1074	6	-	Arabidopsis thaliana
Zm00001d002374	GA-motif	ATAGATAA	757	8	-	Arabidopsis thaliana	part of a light responsive element
Zm00001d002374	TGA-element	AACGAC	904	6	+	Brassica oleracea	auxin-responsive element
Zm00001d002374	CAAT-box	CAAT	48	4	+	Nicotiana glutinosa
Zm00001d002374	CAAT-box	CAAAT	50	5	-	Pisum sativum	common cis-acting element in promoter and enhancer regions
Zm00001d002374	CAAT-box	CAAT	126	4	+	Nicotiana glutinosa
Zm00001d002374	CAAT-box	CAAAT	128	5	-	Pisum sativum	common cis-acting element in promoter and enhancer regions
Zm00001d002374	CAAT-box	CCAAT	304	5	+	Arabidopsis thaliana	common cis-acting element in promoter and enhancer regions
Zm00001d002374	CAAT-box	CAAT	305	4	+	Nicotiana glutinosa
Zm00001d002374	CAAT-box	CAAT	403	4	+	Nicotiana glutinosa
Zm00001d002374	CAAT-box	CAAAT	493	5	-	Pisum sativum	common cis-acting element in promoter and enhancer regions
Zm00001d002374	CAAT-box	CAAT	621	4	-	Nicotiana glutinosa
Zm00001d002374	CAAT-box	CAAT	728	4	+	Nicotiana glutinosa
Zm00001d002374	CAAT-box	CAAT	796	4	+	Nicotiana glutinosa
Zm00001d002374	CAAT-box	CAAT	809	4	+	Nicotiana glutinosa
Zm00001d002374	CAAT-box	CAAAT	888	5	+	Pisum sativum	common cis-acting element in promoter and enhancer regions
Zm00001d002374	CAAT-box	CAAAT	891	5	-	Pisum sativum	common cis-acting element in promoter and enhancer regions
Zm00001d002374	CAAT-box	CAAT	1016	4	+	Nicotiana glutinosa
Zm00001d002374	CAAT-box	CAAAT	1023	5	-	Pisum sativum	common cis-acting element in promoter and enhancer regions
Zm00001d002374	CAAT-box	CAAAT	1034	5	+	Pisum sativum	common cis-acting element in promoter and enhancer regions
Zm00001d002374	CAAT-box	CAAAT	1158	5	-	Pisum sativum	common cis-acting element in promoter and enhancer regions
Zm00001d002374	CAAT-box	CAAT	1207	4	-	Nicotiana glutinosa
Zm00001d002374	CAAT-box	CAAT	1298	4	-	Nicotiana glutinosa
Zm00001d002374	TCA	TCATCTTCAT	1182	9	-	Pisum sativum
Zm00001d002374	TATA-box	TATATA	77	6	+	Arabidopsis thaliana	core promoter element around -30 of transcription start
Zm00001d002374	TATA-box	ATATAT	78	6	+	Brassica napus	core promoter element around -30 of transcription start
Zm00001d002374	TATA-box	TATATA	79	6	+	Arabidopsis thaliana	core promoter element around -30 of transcription start
Zm00001d002374	TATA-box	TATA	81	4	+	Arabidopsis thaliana	core promoter element around -30 of transcription start
Zm00001d002374	TATA-box	ATATAT	189	6	+	Brassica napus	core promoter element around -30 of transcription start
Zm00001d002374	TATA-box	TATA	190	4	+	Arabidopsis thaliana	core promoter element around -30 of transcription start
Zm00001d002374	TATA-box	ATATAT	371	6	+	Brassica napus	core promoter element around -30 of transcription start
Zm00001d002374	TATA-box	TATA	372	4	+	Arabidopsis thaliana	core promoter element around -30 of transcription start
Zm00001d002374	TATA-box	TATAAA	526	6	-	Helianthus annuus	core promoter element around -30 of transcription start
Zm00001d002374	TATA-box	TATAA	527	5	-	Arabidopsis thaliana	core promoter element around -30 of transcription start
Zm00001d002374	TATA-box	TATA	528	4	+	Arabidopsis thaliana	core promoter element around -30 of transcription start
Zm00001d002374	TATA-box	TATTTAAA	553	8	+	Arabidopsis thaliana	core promoter element around -30 of transcription start
Zm00001d002374	TATA-box	TATA	645	4	+	Arabidopsis thaliana	core promoter element around -30 of transcription start
Zm00001d002374	TATA-box	TATA	762	4	-	Arabidopsis thaliana	core promoter element around -30 of transcription start
Zm00001d002374	TATA-box	ATATAA	950	6	+	Brassica oleracea	core promoter element around -30 of transcription start
Zm00001d002374	TATA-box	TATA	951	4	-	Arabidopsis thaliana	core promoter element around -30 of transcription start
Zm00001d002374	TATA-box	TAAAGATT	958	8	-	Arabidopsis thaliana	core promoter element around -30 of transcription start
Zm00001d002374	TATA-box	ATTATA	984	6	+	Brassica napus	core promoter element around -30 of transcription start
Zm00001d002374	TATA-box	TATAA	985	5	-	Arabidopsis thaliana	core promoter element around -30 of transcription start
Zm00001d002374	TATA-box	TATA	986	4	-	Arabidopsis thaliana	core promoter element around -30 of transcription start
Zm00001d002374	TATA-box	TATA	1064	4	-	Arabidopsis thaliana	core promoter element around -30 of transcription start
Zm00001d002374	TATA-box	TATTTAAA	1085	8	-	Arabidopsis thaliana	core promoter element around -30 of transcription start
Zm00001d002374	TATA-box	ATATAT	1294	6	-	Brassica napus	core promoter element around -30 of transcription start
Zm00001d002374	TATA-box	TATA	1295	4	-	Arabidopsis thaliana	core promoter element around -30 of transcription start
Zm00001d002374	TATC-box	TATCCCA	1135	7	-	Oryza sativa	cis-acting element involved in gibberellin-responsiveness
Zm00001d002374	STRE	AGGGG	514	5	+	Arabidopsis thaliana
Zm00001d002374	STRE	AGGGG	1357	5	-	Arabidopsis thaliana
Zm00001d002374	STRE	AGGGG	1373	5	-	Arabidopsis thaliana
Zm00001d002374	Myb	TAACTG	1213	6	-	Arabidopsis thaliana
Zm00001d002374	WRE3	CCACCT	683	6	-	Pisum sativum
Zm00001d002374	WRE3	CCACCT	1310	6	+	Pisum sativum
Zm00001d002374		motif_sequence	41	4	-	organism	short_function
Zm00001d002374		motif_sequence	105	4	+	organism	short_function
Zm00001d002374		motif_sequence	236	4	-	organism	short_function
Zm00001d002374		motif_sequence	270	4	+	organism	short_function
Zm00001d002374		motif_sequence	288	4	-	organism	short_function
Zm00001d002374		motif_sequence	292	4	+	organism	short_function
Zm00001d002374		motif_sequence	471	4	+	organism	short_function
Zm00001d002374		motif_sequence	709	4	-	organism	short_function
Zm00001d002374		motif_sequence	785	4	-	organism	short_function
Zm00001d002374		motif_sequence	834	4	-	organism	short_function
Zm00001d002374		motif_sequence	1037	4	+	organism	short_function
Zm00001d002374		motif_sequence	1184	4	-	organism	short_function
Zm00001d002374		motif_sequence	1389	4	-	organism	short_function
Zm00001d002374	ATC-motif	AGTAATCT	955	8	+	Spinacia oleracea	part of a conserved DNA module involved in light responsiveness
Zm00001d002374	Unnamed__4	CTCC	56	4	+	Petroselinum hortense
Zm00001d002374	Unnamed__4	CTCC	107	4	+	Petroselinum hortense
Zm00001d002374	Unnamed__4	CTCC	272	4	+	Petroselinum hortense
Zm00001d002374	Unnamed__4	CTCC	276	4	-	Petroselinum hortense
Zm00001d002374	Unnamed__4	CTCC	724	4	-	Petroselinum hortense
Zm00001d002374	Unnamed__4	CTCC	852	4	+	Petroselinum hortense
Zm00001d002374	Unnamed__4	CTCC	856	4	+	Petroselinum hortense
Zm00001d002374	Unnamed__4	CTCC	924	4	-	Petroselinum hortense
Zm00001d002374	Unnamed__4	CTCC	928	4	-	Petroselinum hortense
Zm00001d002374	Unnamed__4	CTCC	969	4	+	Petroselinum hortense
Zm00001d002374	Unnamed__4	CTCC	1197	4	-	Petroselinum hortense
Zm00001d002374	Unnamed__4	CTCC	1355	4	+	Petroselinum hortense
Zm00001d002374	Unnamed__4	CTCC	1395	4	+	Petroselinum hortense
Zm00001d002374	Unnamed__4	CTCC	1437	4	+	Petroselinum hortense
Zm00001d002374	Box 4	ATTAAT	593	6	+	Petroselinum crispum	part of a conserved DNA module involved in light responsiveness
Zm00001d002374	Box 4	ATTAAT	844	6	-	Petroselinum crispum	part of a conserved DNA module involved in light responsiveness
Zm00001d002374	MYC	CATTTG	492	6	+	Arabidopsis thaliana
Zm00001d002374	MYC	CATTTG	1034	6	-	Arabidopsis thaliana
Zm00001d002847	AT~TATA-box	TATATA	397	6	+	Arabidopsis thaliana
Zm00001d002847	AT~TATA-box	TATATA	431	6	+	Arabidopsis thaliana
Zm00001d002847	GT1-motif	GGTTAA	370	6	-	Arabidopsis thaliana	light responsive element
Zm00001d002847	GT1-motif	GGTTAA	1161	6	-	Arabidopsis thaliana	light responsive element
Zm00001d002847	GT1-motif	GGTTAA	1282	6	+	Arabidopsis thaliana	light responsive element
Zm00001d002847	CCGTCC motif	CCGTCC	806	6	-	Nicotiana tabacum
Zm00001d002847	AAGAA-motif	gGTAAAGAAA	1056	9	+	Avena sativa
Zm00001d002847	TATA	TATAAAAT	433	8	+	Arabidopsis thaliana
Zm00001d002847	TATA	TATAAAAT	1468	8	+	Arabidopsis thaliana
Zm00001d002847	MYB	TAACCA	371	6	+	Arabidopsis thaliana
Zm00001d002847	MYB	TAACCA	1395	6	+	Arabidopsis thaliana
Zm00001d002847	MYB	CAACAG	1421	6	-	Arabidopsis thaliana
Zm00001d002847	MSA-like	(T/C)C(T/C)AACGG(T/C)(T/C)A	1089	8.5	+	Catharanthus roseus	cis-acting element involved in cell cycle regulation
Zm00001d002847	G-box	ACACGTG(G/t)CACC	863	10.5	-	Lycopersicon esculentum	cis-acting regulatory element involved in light responsiveness
Zm00001d002847	G-box	TAACACGTAG	867	9	-	Brassica oleracea	cis-acting regulatory element involved in light responsiveness
Zm00001d002847	G-box	CACGTG	868	6	-	Arabidopsis thaliana	cis-acting regulatory element involved in light responsiveness
Zm00001d002847	G-box	CACGTG	1384	6	-	Arabidopsis thaliana	cis-acting regulatory element involved in light responsiveness
Zm00001d002847	CAT-box	GCCACT	1303	6	+	Arabidopsis thaliana	cis-acting regulatory element related to meristem expression
Zm00001d002847	Myc	TCTCTTA	997	7	-	Arabidopsis thaliana
Zm00001d002847	chs-CMA1a	TTACTTAA	318	8	-	Daucus carota	part of a light responsive element
Zm00001d002847	MRE	AACCTAA	1144	7	-	Petroselinum crispum	MYB binding site involved in light responsiveness
Zm00001d002847	MYB-like sequence	TAACCA	371	6	+	Arabidopsis thaliana
Zm00001d002847	MYB-like sequence	TAACCA	1395	6	+	Arabidopsis thaliana
Zm00001d002847	TGACG-motif	TGACG	68	5	+	Hordeum vulgare	cis-acting regulatory element involved in the MeJA-responsiveness
Zm00001d002847	TGACG-motif	TGACG	554	5	-	Hordeum vulgare	cis-acting regulatory element involved in the MeJA-responsiveness
Zm00001d002847	TGACG-motif	TGACG	969	5	+	Hordeum vulgare	cis-acting regulatory element involved in the MeJA-responsiveness
Zm00001d002847	TGACG-motif	TGACG	1388	5	+	Hordeum vulgare	cis-acting regulatory element involved in the MeJA-responsiveness
Zm00001d002847	as-1	TGACG	68	5	+	Arabidopsis thaliana
Zm00001d002847	as-1	TGACG	554	5	-	Arabidopsis thaliana
Zm00001d002847	as-1	TGACG	969	5	+	Arabidopsis thaliana
Zm00001d002847	as-1	TGACG	1388	5	+	Arabidopsis thaliana
Zm00001d002847	GATA-motif	AAGGATAAGG	348	9	+	Solanum tuberosum	part of a light responsive element
Zm00001d002847	Unnamed__1	CGTGG	867	5	-	Zea mays
Zm00001d002847	Unnamed__1	CGTGG	1110	5	+	Zea mays
Zm00001d002847	Unnamed__1	CGTGG	1427	5	+	Zea mays
Zm00001d002847	Unnamed__1	CGTGG	1450	5	-	Zea mays
Zm00001d002847	ARE	AAACCA	231	6	+	Zea mays	cis-acting regulatory element essential for the anaerobic induction
Zm00001d002847	ARE	AAACCA	252	6	+	Zea mays	cis-acting regulatory element essential for the anaerobic induction
Zm00001d002847	ABRE	CACGTG	868	6	-	Arabidopsis thaliana	cis-acting element involved in the abscisic acid responsiveness
Zm00001d002847	ABRE	ACGTG	869	5	+	Arabidopsis thaliana	cis-acting element involved in the abscisic acid responsiveness
Zm00001d002847	ABRE	TACGGTC	1206	7	+	Arabidopsis thaliana	cis-acting element involved in the abscisic acid responsiveness
Zm00001d002847	ABRE	CACGTG	1384	6	-	Arabidopsis thaliana	cis-acting element involved in the abscisic acid responsiveness
Zm00001d002847	ABRE	ACGTG	1385	5	+	Arabidopsis thaliana	cis-acting element involved in the abscisic acid responsiveness
Zm00001d002847	Myb-binding site	CAACAG	1421	6	-	Nicotiana tabacum
Zm00001d002847	Unnamed__2	CCCCGG	745	6	-	Zea mays
Zm00001d002847	A-box	CCGTCC	806	6	-	Petroselinum crispum	cis-acting regulatory element
Zm00001d002847	G-Box	CACGTG	868	6	-	Pisum sativum	cis-acting regulatory element involved in light responsiveness
Zm00001d002847	G-Box	CACGTG	1384	6	-	Pisum sativum	cis-acting regulatory element involved in light responsiveness
Zm00001d002847	TATA-box	TATA	225	4	+	Arabidopsis thaliana	core promoter element around -30 of transcription start
Zm00001d002847	TATA-box	TATA	335	4	+	Arabidopsis thaliana	core promoter element around -30 of transcription start
Zm00001d002847	TATA-box	ATTATA	395	6	+	Brassica napus	core promoter element around -30 of transcription start
Zm00001d002847	TATA-box	TATATAA	396	7	-	Arabidopsis thaliana	core promoter element around -30 of transcription start
Zm00001d002847	TATA-box	TATATA	397	6	+	Arabidopsis thaliana	core promoter element around -30 of transcription start
Zm00001d002847	TATA-box	TATA	399	4	+	Arabidopsis thaliana	core promoter element around -30 of transcription start
Zm00001d002847	TATA-box	ATTATA	429	6	+	Brassica napus	core promoter element around -30 of transcription start
Zm00001d002847	TATA-box	TATATAA	430	7	-	Arabidopsis thaliana	core promoter element around -30 of transcription start
Zm00001d002847	TATA-box	TATATA	431	6	+	Arabidopsis thaliana	core promoter element around -30 of transcription start
Zm00001d002847	TATA-box	ATATAA	432	6	+	Brassica oleracea	core promoter element around -30 of transcription start
Zm00001d002847	TATA-box	TATA	433	4	+	Arabidopsis thaliana	core promoter element around -30 of transcription start
Zm00001d002847	TATA-box	ATATAA	560	6	+	Brassica oleracea	core promoter element around -30 of transcription start
Zm00001d002847	TATA-box	TATA	561	4	+	Arabidopsis thaliana	core promoter element around -30 of transcription start
Zm00001d002847	TATA-box	TACAAAA	587	7	+	Oryza sativa	core promoter element around -30 of transcription start
Zm00001d002847	TATA-box	TACAAAA	638	7	+	Oryza sativa	core promoter element around -30 of transcription start
Zm00001d002847	TATA-box	ATTATA	644	6	+	Brassica napus	core promoter element around -30 of transcription start
Zm00001d002847	TATA-box	TATAA	645	5	-	Arabidopsis thaliana	core promoter element around -30 of transcription start
Zm00001d002847	TATA-box	TATA	646	4	+	Arabidopsis thaliana	core promoter element around -30 of transcription start
Zm00001d002847	TATA-box	TATAA	901	5	-	Arabidopsis thaliana	core promoter element around -30 of transcription start
Zm00001d002847	TATA-box	TATA	902	4	-	Arabidopsis thaliana	core promoter element around -30 of transcription start
Zm00001d002847	TATA-box	ATATAT	933	6	-	Brassica napus	core promoter element around -30 of transcription start
Zm00001d002847	TATA-box	TATA	934	4	-	Arabidopsis thaliana	core promoter element around -30 of transcription start
Zm00001d002847	TATA-box	ATATAA	994	6	+	Brassica oleracea	core promoter element around -30 of transcription start
Zm00001d002847	TATA-box	TATA	995	4	-	Arabidopsis thaliana	core promoter element around -30 of transcription start
Zm00001d002847	TATA-box	TATAAAA	1240	7	-	Pisum sativum	core promoter element around -30 of transcription start
Zm00001d002847	TATA-box	TATAAA	1241	6	-	Helianthus annuus	core promoter element around -30 of transcription start
Zm00001d002847	TATA-box	TATAA	1242	5	-	Arabidopsis thaliana	core promoter element around -30 of transcription start
Zm00001d002847	TATA-box	TATA	1243	4	-	Arabidopsis thaliana	core promoter element around -30 of transcription start
Zm00001d002847	TATA-box	TATA	1468	4	-	Arabidopsis thaliana	core promoter element around -30 of transcription start
Zm00001d002847	STRE	AGGGG	331	5	-	Arabidopsis thaliana
Zm00001d002847	STRE	AGGGG	1489	5	+	Arabidopsis thaliana
Zm00001d002847	CAAT-box	CAAT	33	4	-	Nicotiana glutinosa
Zm00001d002847	CAAT-box	CAAT	48	4	-	Nicotiana glutinosa
Zm00001d002847	CAAT-box	CAAT	81	4	+	Nicotiana glutinosa
Zm00001d002847	CAAT-box	CAAT	105	4	-	Nicotiana glutinosa
Zm00001d002847	CAAT-box	CAAT	170	4	+	Nicotiana glutinosa
Zm00001d002847	CAAT-box	CAAT	174	4	+	Nicotiana glutinosa
Zm00001d002847	CAAT-box	CAAT	269	4	+	Nicotiana glutinosa
Zm00001d002847	CAAT-box	CCAAT	374	5	+	Arabidopsis thaliana	common cis-acting element in promoter and enhancer regions
Zm00001d002847	CAAT-box	CAAT	375	4	+	Nicotiana glutinosa
Zm00001d002847	CAAT-box	CCAAT	385	5	+	Arabidopsis thaliana	common cis-acting element in promoter and enhancer regions
Zm00001d002847	CAAT-box	CAAT	386	4	+	Nicotiana glutinosa
Zm00001d002847	CAAT-box	CAAT	391	4	+	Nicotiana glutinosa
Zm00001d002847	CAAT-box	CAAT	412	4	-	Nicotiana glutinosa
Zm00001d002847	CAAT-box	CAAAT	426	5	+	Pisum sativum	common cis-acting element in promoter and enhancer regions
Zm00001d002847	CAAT-box	CAAAT	521	5	+	Pisum sativum	common cis-acting element in promoter and enhancer regions
Zm00001d002847	CAAT-box	CAAAT	543	5	+	Pisum sativum	common cis-acting element in promoter and enhancer regions
Zm00001d002847	CAAT-box	CAAT	575	4	+	Nicotiana glutinosa
Zm00001d002847	CAAT-box	CAAT	579	4	-	Nicotiana glutinosa
Zm00001d002847	CAAT-box	TGCCAAC	759	7	-	Petunia hybrida	common cis-acting element in promoter and enhancer regions
Zm00001d002847	CAAT-box	CAAT	1026	4	-	Nicotiana glutinosa
Zm00001d002847	CAAT-box	CAAAT	1042	5	+	Pisum sativum	common cis-acting element in promoter and enhancer regions
Zm00001d002847	CAAT-box	CAAAT	1068	5	-	Pisum sativum	common cis-acting element in promoter and enhancer regions
Zm00001d002847	CAAT-box	CAAAT	1134	5	+	Pisum sativum	common cis-acting element in promoter and enhancer regions
Zm00001d002847	CAAT-box	CAAAT	1295	5	+	Pisum sativum	common cis-acting element in promoter and enhancer regions
Zm00001d002847	CAAT-box	CAAAT	1374	5	+	Pisum sativum	common cis-acting element in promoter and enhancer regions
Zm00001d002847	CAAT-box	CCAAT	1407	5	-	Arabidopsis thaliana	common cis-acting element in promoter and enhancer regions
Zm00001d002847	MBS	CAACTG	757	6	-	Arabidopsis thaliana	MYB binding site involved in drought-inducibility
Zm00001d002847	Myb	CAACTG	757	6	-	Arabidopsis thaliana
Zm00001d002847	Myb	TAACTG	1214	6	-	Arabidopsis thaliana
Zm00001d002847	Myb	TAACTG	1308	6	+	Arabidopsis thaliana
Zm00001d002847	Myb	TAACTG	1327	6	+	Arabidopsis thaliana
Zm00001d002847	Box 4	ATTAAT	529	6	+	Petroselinum crispum	part of a conserved DNA module involved in light responsiveness
Zm00001d002847	Unnamed__4	CTCC	25	4	+	Petroselinum hortense
Zm00001d002847	Unnamed__4	CTCC	163	4	+	Petroselinum hortense
Zm00001d002847	Unnamed__4	CTCC	1113	4	-	Petroselinum hortense
Zm00001d002847	Unnamed__4	CTCC	1170	4	-	Petroselinum hortense
Zm00001d002847	Unnamed__4	CTCC	1430	4	-	Petroselinum hortense
Zm00001d002847	Unnamed__4	CTCC	1456	4	+	Petroselinum hortense
Zm00001d002847	O2-site	GATGATGTGG	131	9	+	Zea mays	cis-acting regulatory element involved in zein metabolism regulation
Zm00001d002847	CGTCA-motif	CGTCA	68	5	-	Hordeum vulgare	cis-acting regulatory element involved in the MeJA-responsiveness
Zm00001d002847	CGTCA-motif	CGTCA	554	5	+	Hordeum vulgare	cis-acting regulatory element involved in the MeJA-responsiveness
Zm00001d002847	CGTCA-motif	CGTCA	969	5	-	Hordeum vulgare	cis-acting regulatory element involved in the MeJA-responsiveness
Zm00001d002847	CGTCA-motif	CGTCA	1388	5	-	Hordeum vulgare	cis-acting regulatory element involved in the MeJA-responsiveness
Zm00001d002847	CCGTCC-box	CCGTCC	806	6	-	Petroselinum hortense
Zm00001d002847	Sp1	GGGCGG	705	6	+	Oryza sativa	light responsive element
Zm00001d002847	Sp1	GGGCGG	710	6	+	Oryza sativa	light responsive element
Zm00001d002847		motif_sequence	179	4	-	organism	short_function
Zm00001d002847		motif_sequence	245	4	-	organism	short_function
Zm00001d002847		motif_sequence	291	4	-	organism	short_function
Zm00001d002847		motif_sequence	338	4	+	organism	short_function
Zm00001d002847		motif_sequence	582	4	-	organism	short_function
Zm00001d002847		motif_sequence	629	4	+	organism	short_function
Zm00001d002847		motif_sequence	631	4	-	organism	short_function
Zm00001d002847		motif_sequence	886	4	+	organism	short_function
Zm00001d002847		motif_sequence	952	4	-	organism	short_function
Zm00001d002847		motif_sequence	1257	4	+	organism	short_function
Zm00001d002847		motif_sequence	1430	4	-	organism	short_function
Zm00001d002847		motif_sequence	1474	4	+	organism	short_function
Zm00001d002937		motif_sequence	193	4	+	organism	short_function
Zm00001d002937		motif_sequence	581	4	+	organism	short_function
Zm00001d002937		motif_sequence	841	4	+	organism	short_function
Zm00001d002937		motif_sequence	887	4	+	organism	short_function
Zm00001d002937		motif_sequence	1027	4	+	organism	short_function
Zm00001d002937		motif_sequence	1134	4	+	organism	short_function
Zm00001d002937		motif_sequence	1139	4	+	organism	short_function
Zm00001d002937		motif_sequence	1182	4	+	organism	short_function
Zm00001d002937		motif_sequence	1270	4	+	organism	short_function
Zm00001d002937		motif_sequence	1305	4	-	organism	short_function
Zm00001d002937		motif_sequence	1376	4	-	organism	short_function
Zm00001d002937		motif_sequence	1394	4	-	organism	short_function
Zm00001d002937		motif_sequence	1483	4	+	organism	short_function
Zm00001d002937	MYB recognition site	CCGTTG	1068	6	-	Arabidopsis thaliana
Zm00001d002937	MYC	CATTTG	292	6	+	Arabidopsis thaliana
Zm00001d002937	MYC	CATGTG	595	6	-	Arabidopsis thaliana
Zm00001d002937	MYC	CATGTG	698	6	-	Arabidopsis thaliana
Zm00001d002937	MYC	CATGTG	1377	6	-	Arabidopsis thaliana
Zm00001d002937	MYC	CATGTG	1462	6	-	Arabidopsis thaliana
Zm00001d002937	circadian	CAAAGATATC	792	9	+	Lycopersicon esculentum	cis-acting regulatory element involved in circadian control
Zm00001d002937	Unnamed__4	CTCC	168	4	+	Petroselinum hortense
Zm00001d002937	Unnamed__4	CTCC	195	4	+	Petroselinum hortense
Zm00001d002937	Unnamed__4	CTCC	313	4	+	Petroselinum hortense
Zm00001d002937	Unnamed__4	CTCC	427	4	-	Petroselinum hortense
Zm00001d002937	Unnamed__4	CTCC	448	4	-	Petroselinum hortense
Zm00001d002937	Unnamed__4	CTCC	569	4	+	Petroselinum hortense
Zm00001d002937	Unnamed__4	CTCC	843	4	+	Petroselinum hortense
Zm00001d002937	Unnamed__4	CTCC	954	4	-	Petroselinum hortense
Zm00001d002937	Unnamed__4	CTCC	990	4	-	Petroselinum hortense
Zm00001d002937	Unnamed__4	CTCC	1072	4	-	Petroselinum hortense
Zm00001d002937	Unnamed__4	CTCC	1091	4	+	Petroselinum hortense
Zm00001d002937	Unnamed__4	CTCC	1171	4	-	Petroselinum hortense
Zm00001d002937	Unnamed__4	CTCC	1312	4	+	Petroselinum hortense
Zm00001d002937	TCCC-motif	TCTCCCT	842	7	+	Spinacia oleracea	part of a light responsive element
Zm00001d002937	DRE1	ACCGAGA	813	7	-	Zea mays
Zm00001d002937	CCAAT-box	CAACGG	1068	6	+	Hordeum vulgare	MYBHv1 binding site
Zm00001d002937	STRE	AGGGG	171	5	-	Arabidopsis thaliana
Zm00001d002937	STRE	AGGGG	316	5	-	Arabidopsis thaliana
Zm00001d002937	STRE	AGGGG	488	5	-	Arabidopsis thaliana
Zm00001d002937	STRE	AGGGG	572	5	-	Arabidopsis thaliana
Zm00001d002937	TATA-box	TATA	23	4	+	Arabidopsis thaliana	core promoter element around -30 of transcription start
Zm00001d002937	TATA-box	TACAAAA	214	7	-	Oryza sativa	core promoter element around -30 of transcription start
Zm00001d002937	TATA-box	TATA	709	4	+	Arabidopsis thaliana	core promoter element around -30 of transcription start
Zm00001d002937	TATA-box	ATATAA	1388	6	+	Brassica oleracea	core promoter element around -30 of transcription start
Zm00001d002937	TATA-box	TATA	1389	4	-	Arabidopsis thaliana	core promoter element around -30 of transcription start
Zm00001d002937	G-Box	CACGTT	1124	6	+	Pisum sativum	cis-acting regulatory element involved in light responsiveness
Zm00001d002937	CAAT-box	CAAAT	8	5	+	Pisum sativum	common cis-acting element in promoter and enhancer regions
Zm00001d002937	CAAT-box	CAAT	11	4	-	Nicotiana glutinosa
Zm00001d002937	CAAT-box	CAAAT	27	5	-	Pisum sativum	common cis-acting element in promoter and enhancer regions
Zm00001d002937	CAAT-box	CAAAT	36	5	-	Pisum sativum	common cis-acting element in promoter and enhancer regions
Zm00001d002937	CAAT-box	CAAAT	74	5	+	Pisum sativum	common cis-acting element in promoter and enhancer regions
Zm00001d002937	CAAT-box	CAAT	149	4	-	Nicotiana glutinosa
Zm00001d002937	CAAT-box	CCAAT	161	5	+	Arabidopsis thaliana	common cis-acting element in promoter and enhancer regions
Zm00001d002937	CAAT-box	CAAT	162	4	+	Nicotiana glutinosa
Zm00001d002937	CAAT-box	CAAAT	210	5	+	Pisum sativum	common cis-acting element in promoter and enhancer regions
Zm00001d002937	CAAT-box	CAAAT	237	5	+	Pisum sativum	common cis-acting element in promoter and enhancer regions
Zm00001d002937	CAAT-box	CAAT	258	4	-	Nicotiana glutinosa
Zm00001d002937	CAAT-box	CAAAT	293	5	-	Pisum sativum	common cis-acting element in promoter and enhancer regions
Zm00001d002937	CAAT-box	CAAT	367	4	-	Nicotiana glutinosa
Zm00001d002937	CAAT-box	CAAAT	377	5	+	Pisum sativum	common cis-acting element in promoter and enhancer regions
Zm00001d002937	CAAT-box	CAAAT	380	5	-	Pisum sativum	common cis-acting element in promoter and enhancer regions
Zm00001d002937	CAAT-box	CAAT	386	4	+	Nicotiana glutinosa
Zm00001d002937	CAAT-box	CAAT	403	4	+	Nicotiana glutinosa
Zm00001d002937	CAAT-box	CAAT	418	4	-	Nicotiana glutinosa
Zm00001d002937	CAAT-box	CAAT	495	4	+	Nicotiana glutinosa
Zm00001d002937	CAAT-box	CAAAT	654	5	+	Pisum sativum	common cis-acting element in promoter and enhancer regions
Zm00001d002937	CAAT-box	CAAT	716	4	+	Nicotiana glutinosa
Zm00001d002937	CAAT-box	CAAT	932	4	-	Nicotiana glutinosa
Zm00001d002937	CAAT-box	CAAT	943	4	-	Nicotiana glutinosa
Zm00001d002937	CAAT-box	CAAT	973	4	-	Nicotiana glutinosa
Zm00001d002937	CAAT-box	CCAAT	1119	5	-	Arabidopsis thaliana	common cis-acting element in promoter and enhancer regions
Zm00001d002937	CAAT-box	CAAT	1203	4	+	Nicotiana glutinosa
Zm00001d002937	CAAT-box	CAAT	1419	4	+	Nicotiana glutinosa
Zm00001d002937	CAAT-box	CCAAT	1488	5	+	Arabidopsis thaliana	common cis-acting element in promoter and enhancer regions
Zm00001d002937	CAAT-box	CAAT	1489	4	+	Nicotiana glutinosa
Zm00001d002937	CAAT-box	CAAAT	1491	5	-	Pisum sativum	common cis-acting element in promoter and enhancer regions
Zm00001d002937	P-box	CCTTTTG	396	7	-	Oryza sativa	gibberellin-responsive element
Zm00001d002937	P-box	CCTTTTG	764	7	-	Oryza sativa	gibberellin-responsive element
Zm00001d002937	P-box	CCTTTTG	846	7	+	Oryza sativa	gibberellin-responsive element
Zm00001d002937	Unnamed__2	CCCCGG	613	6	-	Zea mays
Zm00001d002937	ABRE	ACGTG	1124	5	-	Arabidopsis thaliana	cis-acting element involved in the abscisic acid responsiveness
Zm00001d002937	ABRE	CGCACGTGTC	1460	9	-	Hordeum vulgare	cis-acting element involved in the abscisic acid responsiveness
Zm00001d002937	Myb-binding site	CAACAG	1359	6	+	Nicotiana tabacum
Zm00001d002937	GATA-motif	GATAGGA	90	7	-	Arabidopsis thaliana	part of a light responsive element
Zm00001d002937	GATA-motif	GATAGGG	1061	7	+	Pisum sativum	part of a light responsive element
Zm00001d002937	GATA-motif	GATAGGA	1143	7	-	Arabidopsis thaliana	part of a light responsive element
Zm00001d002937	ARE	AAACCA	61	6	-	Zea mays	cis-acting regulatory element essential for the anaerobic induction
Zm00001d002937	ARE	AAACCA	694	6	+	Zea mays	cis-acting regulatory element essential for the anaerobic induction
Zm00001d002937	ARE	AAACCA	1444	6	+	Zea mays	cis-acting regulatory element essential for the anaerobic induction
Zm00001d002937	Unnamed__1	CGTGG	1093	5	-	Zea mays
Zm00001d002937	G-box	CACGAC	1094	6	+	Zea mays	cis-acting regulatory element involved in light responsiveness
Zm00001d002937	AE-box	AGAAACAA	1078	8	-	Arabidopsis thaliana	part of a module for light response
Zm00001d002937	ERE	ATTTCATA	657	8	+	Nicotiana glutinos
Zm00001d002937	MYB	CAACAG	1359	6	+	Arabidopsis thaliana
Zm00001d002937	GT1-motif	GGTTAA	359	6	-	Arabidopsis thaliana	light responsive element
Zm00001d002937	W box	TTGACC	551	6	-	Arabidopsis thaliana
Zm00001d002937	AAGAA-motif	gGTAAAGAAA	790	9	+	Avena sativa
Zm00001d009212		motif_sequence	28	4	+	organism	short_function
Zm00001d009212		motif_sequence	51	4	-	organism	short_function
Zm00001d009212		motif_sequence	84	4	+	organism	short_function
Zm00001d009212		motif_sequence	194	4	+	organism	short_function
Zm00001d009212		motif_sequence	261	4	+	organism	short_function
Zm00001d009212		motif_sequence	282	4	+	organism	short_function
Zm00001d009212		motif_sequence	300	4	+	organism	short_function
Zm00001d009212		motif_sequence	324	4	+	organism	short_function
Zm00001d009212		motif_sequence	355	4	+	organism	short_function
Zm00001d009212		motif_sequence	720	4	-	organism	short_function
Zm00001d009212		motif_sequence	960	4	+	organism	short_function
Zm00001d009212		motif_sequence	979	4	+	organism	short_function
Zm00001d009212		motif_sequence	1410	4	+	organism	short_function
Zm00001d009212		motif_sequence	1459	4	+	organism	short_function
Zm00001d009212	CGTCA-motif	CGTCA	4	5	+	Hordeum vulgare	cis-acting regulatory element involved in the MeJA-responsiveness
Zm00001d009212	CGTCA-motif	CGTCA	124	5	-	Hordeum vulgare	cis-acting regulatory element involved in the MeJA-responsiveness
Zm00001d009212	CGTCA-motif	CGTCA	165	5	+	Hordeum vulgare	cis-acting regulatory element involved in the MeJA-responsiveness
Zm00001d009212	AT~ABRE	TACGTGTC	313	8	-	Arabidopsis thaliana
Zm00001d009212	circadian	CAAAGATATC	878	9	+	Lycopersicon esculentum	cis-acting regulatory element involved in circadian control
Zm00001d009212	Unnamed__4	CTCC	159	4	-	Petroselinum hortense
Zm00001d009212	Unnamed__4	CTCC	185	4	+	Petroselinum hortense
Zm00001d009212	Unnamed__4	CTCC	200	4	+	Petroselinum hortense
Zm00001d009212	Unnamed__4	CTCC	210	4	+	Petroselinum hortense
Zm00001d009212	Unnamed__4	CTCC	218	4	+	Petroselinum hortense
Zm00001d009212	Unnamed__4	CTCC	221	4	+	Petroselinum hortense
Zm00001d009212	Unnamed__4	CTCC	263	4	+	Petroselinum hortense
Zm00001d009212	Unnamed__4	CTCC	302	4	+	Petroselinum hortense
Zm00001d009212	Unnamed__4	CTCC	357	4	+	Petroselinum hortense
Zm00001d009212	Unnamed__4	CTCC	488	4	+	Petroselinum hortense
Zm00001d009212	Unnamed__4	CTCC	559	4	+	Petroselinum hortense
Zm00001d009212	WRE3	CCACCT	540	6	+	Pisum sativum
Zm00001d009212	WRE3	CCACCT	565	6	+	Pisum sativum
Zm00001d009212	DRE core	GCCGAC	39	6	+	Arabidopsis thaliana
Zm00001d009212	DRE core	GCCGAC	639	6	-	Arabidopsis thaliana
Zm00001d009212	ABRE3a	TACGTG	315	6	-	Zea mays
Zm00001d009212	CAAT-box	CAAT	98	4	+	Nicotiana glutinosa
Zm00001d009212	CAAT-box	CCAAT	254	5	+	Arabidopsis thaliana	common cis-acting element in promoter and enhancer regions
Zm00001d009212	CAAT-box	CAAT	255	4	+	Nicotiana glutinosa
Zm00001d009212	CAAT-box	CCAAT	276	5	-	Arabidopsis thaliana	common cis-acting element in promoter and enhancer regions
Zm00001d009212	CAAT-box	CAAT	339	4	-	Nicotiana glutinosa
Zm00001d009212	CAAT-box	CCAAT	764	5	+	Arabidopsis thaliana	common cis-acting element in promoter and enhancer regions
Zm00001d009212	CAAT-box	CAAT	765	4	+	Nicotiana glutinosa
Zm00001d009212	CAAT-box	CCAAT	820	5	-	Arabidopsis thaliana	common cis-acting element in promoter and enhancer regions
Zm00001d009212	CAAT-box	CAAAT	902	5	+	Pisum sativum	common cis-acting element in promoter and enhancer regions
Zm00001d009212	CAAT-box	CAAT	927	4	-	Nicotiana glutinosa
Zm00001d009212	CAAT-box	CAAAT	1051	5	+	Pisum sativum	common cis-acting element in promoter and enhancer regions
Zm00001d009212	CAAT-box	CAAT	1122	4	+	Nicotiana glutinosa
Zm00001d009212	CAAT-box	CAAT	1179	4	-	Nicotiana glutinosa
Zm00001d009212	CAAT-box	CAAT	1254	4	-	Nicotiana glutinosa
Zm00001d009212	STRE	AGGGG	118	5	-	Arabidopsis thaliana
Zm00001d009212	STRE	AGGGG	482	5	-	Arabidopsis thaliana
Zm00001d009212	STRE	AGGGG	578	5	-	Arabidopsis thaliana
Zm00001d009212	TATA-box	ccTATAAAaa	366	9	+	Arabidopsis thaliana	core promoter element around -30 of transcription start
Zm00001d009212	TATA-box	TATA	368	4	+	Arabidopsis thaliana	core promoter element around -30 of transcription start
Zm00001d009212	TATA-box	ATATAT	737	6	+	Brassica napus	core promoter element around -30 of transcription start
Zm00001d009212	TATA-box	TATA	738	4	+	Arabidopsis thaliana	core promoter element around -30 of transcription start
Zm00001d009212	TATA-box	TATA	771	4	-	Arabidopsis thaliana	core promoter element around -30 of transcription start
Zm00001d009212	TATA-box	ATATAA	888	6	+	Brassica oleracea	core promoter element around -30 of transcription start
Zm00001d009212	TATA-box	TATA	889	4	-	Arabidopsis thaliana	core promoter element around -30 of transcription start
Zm00001d009212	TATA-box	TATA	935	4	-	Arabidopsis thaliana	core promoter element around -30 of transcription start
Zm00001d009212	TATA-box	TATAA	969	5	-	Arabidopsis thaliana	core promoter element around -30 of transcription start
Zm00001d009212	TATA-box	TATA	970	4	-	Arabidopsis thaliana	core promoter element around -30 of transcription start
Zm00001d009212	TATA-box	TATA	997	4	-	Arabidopsis thaliana	core promoter element around -30 of transcription start
Zm00001d009212	TATA-box	ATATAA	1014	6	+	Brassica oleracea	core promoter element around -30 of transcription start
Zm00001d009212	TATA-box	TATA	1015	4	-	Arabidopsis thaliana	core promoter element around -30 of transcription start
Zm00001d009212	TATA-box	TATA	1047	4	-	Arabidopsis thaliana	core promoter element around -30 of transcription start
Zm00001d009212	TATA-box	ATATAT	1054	6	-	Brassica napus	core promoter element around -30 of transcription start
Zm00001d009212	TATA-box	TATA	1055	4	-	Arabidopsis thaliana	core promoter element around -30 of transcription start
Zm00001d009212	TATA-box	TATATTTATATTT	1063	12	-	Avena sativa	core promoter element around -30 of transcription start
Zm00001d009212	TATA-box	TATATA	1064	6	-	Arabidopsis thaliana	core promoter element around -30 of transcription start
Zm00001d009212	TATA-box	ATATAA	1065	6	+	Brassica oleracea	core promoter element around -30 of transcription start
Zm00001d009212	TATA-box	TATA	1066	4	-	Arabidopsis thaliana	core promoter element around -30 of transcription start
Zm00001d009212	TATA-box	ATATAT	1071	6	-	Brassica napus	core promoter element around -30 of transcription start
Zm00001d009212	TATA-box	TATA	1072	4	-	Arabidopsis thaliana	core promoter element around -30 of transcription start
Zm00001d009212	TATA-box	ATTATA	1099	6	+	Brassica napus	core promoter element around -30 of transcription start
Zm00001d009212	TATA-box	TATAA	1100	5	-	Arabidopsis thaliana	core promoter element around -30 of transcription start
Zm00001d009212	TATA-box	TATA	1101	4	-	Arabidopsis thaliana	core promoter element around -30 of transcription start
Zm00001d009212	TATA-box	TATAA	1147	5	-	Arabidopsis thaliana	core promoter element around -30 of transcription start
Zm00001d009212	TATA-box	TATA	1148	4	-	Arabidopsis thaliana	core promoter element around -30 of transcription start
Zm00001d009212	TATA-box	TATTTAAA	1150	8	+	Arabidopsis thaliana	core promoter element around -30 of transcription start
Zm00001d009212	TATA-box	ATATAT	1164	6	-	Brassica napus	core promoter element around -30 of transcription start
Zm00001d009212	TATA-box	TATATA	1165	6	-	Arabidopsis thaliana	core promoter element around -30 of transcription start
Zm00001d009212	TATA-box	ATATAA	1166	6	+	Brassica oleracea	core promoter element around -30 of transcription start
Zm00001d009212	TATA-box	TATA	1167	4	-	Arabidopsis thaliana	core promoter element around -30 of transcription start
Zm00001d009212	TATA-box	TATACA	1181	6	-	Helianthus annuus	core promoter element around -30 of transcription start
Zm00001d009212	TATA-box	TATA	1183	4	-	Arabidopsis thaliana	core promoter element around -30 of transcription start
Zm00001d009212	TATA-box	ATATAT	1360	6	-	Brassica napus	core promoter element around -30 of transcription start
Zm00001d009212	TATA-box	TATA	1361	4	-	Arabidopsis thaliana	core promoter element around -30 of transcription start
Zm00001d009212	TATA-box	ccTATAAAaa	1367	9	-	Arabidopsis thaliana	core promoter element around -30 of transcription start
Zm00001d009212	TATA-box	TATAAAA	1368	7	-	Pisum sativum	core promoter element around -30 of transcription start
Zm00001d009212	TATA-box	TATAAA	1369	6	-	Helianthus annuus	core promoter element around -30 of transcription start
Zm00001d009212	TATA-box	TATAA	1370	5	-	Arabidopsis thaliana	core promoter element around -30 of transcription start
Zm00001d009212	TATA-box	TATA	1371	4	-	Arabidopsis thaliana	core promoter element around -30 of transcription start
Zm00001d009212	TATA-box	ATATAA	1380	6	+	Brassica oleracea	core promoter element around -30 of transcription start
Zm00001d009212	TATA-box	TATA	1381	4	-	Arabidopsis thaliana	core promoter element around -30 of transcription start
Zm00001d009212	GC-motif	CCCCCG	652	6	+	Zea mays	enhancer-like element involved in anoxic specific inducibility
Zm00001d009212	Unnamed__2	CCCCGG	653	6	+	Zea mays
Zm00001d009212	TGA-element	AACGAC	1129	6	+	Brassica oleracea	auxin-responsive element
Zm00001d009212	TGA-element	AACGAC	1342	6	-	Brassica oleracea	auxin-responsive element
Zm00001d009212	ABRE	ACGTG	2	5	-	Arabidopsis thaliana	cis-acting element involved in the abscisic acid responsiveness
Zm00001d009212	ABRE	GCAACGTGTC	313	9	-	Hordeum vulgare	cis-acting element involved in the abscisic acid responsiveness
Zm00001d009212	ABRE	ACGTG	315	5	-	Arabidopsis thaliana	cis-acting element involved in the abscisic acid responsiveness
Zm00001d009212	ARE	AAACCA	1330	6	+	Zea mays	cis-acting regulatory element essential for the anaerobic induction
Zm00001d009212	Unnamed__1	CGTGG	1	5	-	Zea mays
Zm00001d009212	Unnamed__1	CGTGG	230	5	-	Zea mays
Zm00001d009212	Unnamed__1	CGTGG	305	5	-	Zea mays
Zm00001d009212	Unnamed__1	CGTGG	466	5	+	Zea mays
Zm00001d009212	Unnamed__1	CGTGG	593	5	-	Zea mays
Zm00001d009212	ABRE4	CACGTA	315	6	+	Zea mays
Zm00001d009212	as-1	TGACG	4	5	-	Arabidopsis thaliana
Zm00001d009212	as-1	TGACG	124	5	+	Arabidopsis thaliana
Zm00001d009212	as-1	TGACG	165	5	-	Arabidopsis thaliana
Zm00001d009212	TGACG-motif	TGACG	4	5	-	Hordeum vulgare	cis-acting regulatory element involved in the MeJA-responsiveness
Zm00001d009212	TGACG-motif	TGACG	124	5	+	Hordeum vulgare	cis-acting regulatory element involved in the MeJA-responsiveness
Zm00001d009212	TGACG-motif	TGACG	165	5	-	Hordeum vulgare	cis-acting regulatory element involved in the MeJA-responsiveness
Zm00001d009212	Myc	TCTCTTA	144	7	+	Arabidopsis thaliana
Zm00001d009212	Myc	TCTCTTA	783	7	+	Arabidopsis thaliana
Zm00001d009212	Unnamed__6	taTAAATATct	1015	10	+	Zea mays
Zm00001d009212	Unnamed__6	taTAAATATct	1066	10	+	Zea mays
Zm00001d009212	CAT-box	GCCACT	1388	6	+	Arabidopsis thaliana	cis-acting regulatory element related to meristem expression
Zm00001d009212	G-box	CACGTC	2	6	+	Zea mays	cis-acting regulatory element involved in light responsiveness
Zm00001d009212	G-box	CACGAC	231	6	+	Zea mays	cis-acting regulatory element involved in light responsiveness
Zm00001d009212	G-box	TACGTG	315	6	-	Arabidopsis thaliana	cis-acting regulatory element involved in light responsiveness
Zm00001d009212	TCT-motif	TCTTAC	146	6	+	Arabidopsis thaliana	part of a light responsive element
Zm00001d009212	TCT-motif	TCTTAC	827	6	+	Arabidopsis thaliana	part of a light responsive element
Zm00001d009212	ERE	ATTTCATA	709	8	-	Nicotiana glutinos
Zm00001d009212	AuxRR-core	GGTCCAT	1403	7	+	Nicotiana tabacum	cis-acting regulatory element involved in auxin responsiveness
Zm00001d009212	AT~TATA-box	TATATA	1064	6	-	Arabidopsis thaliana
Zm00001d009212	AT~TATA-box	TATATA	1165	6	-	Arabidopsis thaliana
Zm00001d015290	G-box	TACGTG	49	6	-	Arabidopsis thaliana	cis-acting regulatory element involved in light responsiveness
Zm00001d015290	G-box	TACGTG	53	6	+	Arabidopsis thaliana	cis-acting regulatory element involved in light responsiveness
Zm00001d015290	G-box	GCCACGTGGA	386	9	+	Arabidopsis thaliana	cis-acting regulatory element involved in light responsiveness
Zm00001d015290	G-box	CACGTG	1198	6	-	Arabidopsis thaliana	cis-acting regulatory element involved in light responsiveness
Zm00001d015290	G-box	CACGTC	1307	6	+	Zea mays	cis-acting regulatory element involved in light responsiveness
Zm00001d015290	G-box	CCACGTAA	1340	8	-	Brassica napus	cis-acting regulatory element involved in light responsiveness
Zm00001d015290	G-box	TACGTG	1341	6	+	Arabidopsis thaliana	cis-acting regulatory element involved in light responsiveness
Zm00001d015290	AuxRR-core	GGTCCAT	1292	7	+	Nicotiana tabacum	cis-acting regulatory element involved in auxin responsiveness
Zm00001d015290	MYB	CAACCA	867	6	-	Arabidopsis thaliana
Zm00001d015290	AT~TATA-box	TATATAAA	1003	8	-	Arabidopsis thaliana
Zm00001d015290	AT~TATA-box	TATATA	1005	6	-	Arabidopsis thaliana
Zm00001d015290	CCGTCC motif	CCGTCC	1412	6	+	Nicotiana tabacum
Zm00001d015290	TGACG-motif	TGACG	369	5	-	Hordeum vulgare	cis-acting regulatory element involved in the MeJA-responsiveness
Zm00001d015290	TGACG-motif	TGACG	1309	5	-	Hordeum vulgare	cis-acting regulatory element involved in the MeJA-responsiveness
Zm00001d015290	as-1	TGACG	369	5	-	Arabidopsis thaliana
Zm00001d015290	as-1	TGACG	1309	5	-	Arabidopsis thaliana
Zm00001d015290	Unnamed__1	CGTGG	508	5	+	Zea mays
Zm00001d015290	Unnamed__1	CGTGG	1179	5	-	Zea mays
Zm00001d015290	Unnamed__1	CGTGG	1250	5	+	Zea mays
Zm00001d015290	Unnamed__1	CGTGG	1343	5	+	Zea mays
Zm00001d015290	ABRE4	CACGTA	49	6	+	Zea mays
Zm00001d015290	ABRE4	CACGTA	53	6	-	Zea mays
Zm00001d015290	ABRE4	CACGTA	1341	6	-	Zea mays
Zm00001d015290	DRE core	GCCGAC	90	6	+	Arabidopsis thaliana
Zm00001d015290	DRE core	GCCGAC	640	6	+	Arabidopsis thaliana
Zm00001d015290	DRE core	GCCGAC	709	6	+	Arabidopsis thaliana
Zm00001d015290	G-Box	CACGTG	1198	6	-	Pisum sativum	cis-acting regulatory element involved in light responsiveness
Zm00001d015290	TATA-box	ccTATAAAaa	409	9	+	Arabidopsis thaliana	core promoter element around -30 of transcription start
Zm00001d015290	TATA-box	TATA	411	4	+	Arabidopsis thaliana	core promoter element around -30 of transcription start
Zm00001d015290	TATA-box	TATA	858	4	-	Arabidopsis thaliana	core promoter element around -30 of transcription start
Zm00001d015290	TATA-box	taTATAAAtc	1001	9	-	Arabidopsis thaliana	core promoter element around -30 of transcription start
Zm00001d015290	TATA-box	TATAAAT	1002	7	-	Brassica juncea	core promoter element around -30 of transcription start
Zm00001d015290	TATA-box	TATAAA	1003	6	-	Helianthus annuus	core promoter element around -30 of transcription start
Zm00001d015290	TATA-box	TATATAA	1004	7	-	Arabidopsis thaliana	core promoter element around -30 of transcription start
Zm00001d015290	TATA-box	TATATA	1005	6	-	Arabidopsis thaliana	core promoter element around -30 of transcription start
Zm00001d015290	TATA-box	ATATAA	1006	6	+	Brassica oleracea	core promoter element around -30 of transcription start
Zm00001d015290	TATA-box	TATA	1007	4	-	Arabidopsis thaliana	core promoter element around -30 of transcription start
Zm00001d015290	TATA-box	ATATAA	1094	6	+	Brassica oleracea	core promoter element around -30 of transcription start
Zm00001d015290	TATA-box	TATA	1095	4	-	Arabidopsis thaliana	core promoter element around -30 of transcription start
Zm00001d015290	STRE	AGGGG	360	5	-	Arabidopsis thaliana
Zm00001d015290	STRE	AGGGG	524	5	-	Arabidopsis thaliana
Zm00001d015290	STRE	AGGGG	619	5	-	Arabidopsis thaliana
Zm00001d015290	ABRE3a	TACGTG	49	6	-	Zea mays
Zm00001d015290	ABRE3a	TACGTG	53	6	+	Zea mays
Zm00001d015290	ABRE3a	TACGTG	1341	6	+	Zea mays
Zm00001d015290	CAAT-box	CAAT	37	4	+	Nicotiana glutinosa
Zm00001d015290	CAAT-box	CAAT	770	4	+	Nicotiana glutinosa
Zm00001d015290	CAAT-box	CAAT	785	4	+	Nicotiana glutinosa
Zm00001d015290	CAAT-box	CAAAT	789	5	-	Pisum sativum	common cis-acting element in promoter and enhancer regions
Zm00001d015290	CAAT-box	CAAAT	864	5	-	Pisum sativum	common cis-acting element in promoter and enhancer regions
Zm00001d015290	CAAT-box	CAAT	878	4	+	Nicotiana glutinosa
Zm00001d015290	CAAT-box	CCAAT	961	5	-	Arabidopsis thaliana	common cis-acting element in promoter and enhancer regions
Zm00001d015290	CAAT-box	CAAT	990	4	-	Nicotiana glutinosa
Zm00001d015290	CAAT-box	CAAT	1041	4	+	Nicotiana glutinosa
Zm00001d015290	CAAT-box	CAAT	1321	4	+	Nicotiana glutinosa
Zm00001d015290	MBS	CAACTG	4	6	+	Arabidopsis thaliana	MYB binding site involved in drought-inducibility
Zm00001d015290	MBS	CAACTG	758	6	+	Arabidopsis thaliana	MYB binding site involved in drought-inducibility
Zm00001d015290	MBS	CAACTG	1079	6	+	Arabidopsis thaliana	MYB binding site involved in drought-inducibility
Zm00001d015290	A-box	CCGTCC	1412	6	+	Petroselinum crispum	cis-acting regulatory element
Zm00001d015290	GC-motif	CCCCCG	693	6	+	Zea mays	enhancer-like element involved in anoxic specific inducibility
Zm00001d015290	AC-I	(T/C)C(T/C)(C/T)ACC(T/C)ACC	964	8.5	-	Phaseolus vulgaris
Zm00001d015290	ABRE	CGTACGTGCA	47	9	-	Hordeum vulgare	cis-acting element involved in the abscisic acid responsiveness
Zm00001d015290	ABRE	ACGTG	49	5	-	Arabidopsis thaliana	cis-acting element involved in the abscisic acid responsiveness
Zm00001d015290	ABRE	CGTACGTGCA	51	9	+	Hordeum vulgare	cis-acting element involved in the abscisic acid responsiveness
Zm00001d015290	ABRE	ACGTG	54	5	+	Arabidopsis thaliana	cis-acting element involved in the abscisic acid responsiveness
Zm00001d015290	ABRE	GCCGCGTGGC	659	9	-	Oryza sativa	cis-acting element involved in the abscisic acid responsiveness
Zm00001d015290	ABRE	CACGTG	1198	6	-	Arabidopsis thaliana	cis-acting element involved in the abscisic acid responsiveness
Zm00001d015290	ABRE	ACGTG	1199	5	+	Arabidopsis thaliana	cis-acting element involved in the abscisic acid responsiveness
Zm00001d015290	ABRE	AACCCGG	1243	7	-	Arabidopsis thaliana	cis-acting element involved in the abscisic acid responsiveness
Zm00001d015290	ABRE	ACGTG	1307	5	-	Arabidopsis thaliana	cis-acting element involved in the abscisic acid responsiveness
Zm00001d015290	ABRE	ACGTG	1342	5	+	Arabidopsis thaliana	cis-acting element involved in the abscisic acid responsiveness
Zm00001d015290	ABRE	GCCGCGTGGC	1455	9	-	Oryza sativa	cis-acting element involved in the abscisic acid responsiveness
Zm00001d015290	Unnamed__2	CCCCGG	694	6	+	Zea mays
Zm00001d015290	CGTCA-motif	CGTCA	369	5	+	Hordeum vulgare	cis-acting regulatory element involved in the MeJA-responsiveness
Zm00001d015290	CGTCA-motif	CGTCA	1309	5	+	Hordeum vulgare	cis-acting regulatory element involved in the MeJA-responsiveness
Zm00001d015290	CCGTCC-box	CCGTCC	1412	6	+	Petroselinum hortense
Zm00001d015290	Sp1	GGGCGG	343	6	-	Oryza sativa	light responsive element
Zm00001d015290	Sp1	GGGCGG	1261	6	+	Oryza sativa	light responsive element
Zm00001d015290	Sp1	GGGCGG	1420	6	-	Oryza sativa	light responsive element
Zm00001d015290		motif_sequence	104	4	-	organism	short_function
Zm00001d015290		motif_sequence	111	4	+	organism	short_function
Zm00001d015290		motif_sequence	268	4	-	organism	short_function
Zm00001d015290		motif_sequence	314	4	+	organism	short_function
Zm00001d015290		motif_sequence	353	4	-	organism	short_function
Zm00001d015290		motif_sequence	398	4	+	organism	short_function
Zm00001d015290		motif_sequence	500	4	+	organism	short_function
Zm00001d015290		motif_sequence	811	4	-	organism	short_function
Zm00001d015290		motif_sequence	1110	4	+	organism	short_function
Zm00001d015290		motif_sequence	1123	4	+	organism	short_function
Zm00001d015290		motif_sequence	1389	4	-	organism	short_function
Zm00001d015290		motif_sequence	1471	4	+	organism	short_function
Zm00001d015290	Unnamed__4	CTCC	1	4	+	Petroselinum hortense
Zm00001d015290	Unnamed__4	CTCC	80	4	+	Petroselinum hortense
Zm00001d015290	Unnamed__4	CTCC	104	4	-	Petroselinum hortense
Zm00001d015290	Unnamed__4	CTCC	113	4	+	Petroselinum hortense
Zm00001d015290	Unnamed__4	CTCC	298	4	-	Petroselinum hortense
Zm00001d015290	Unnamed__4	CTCC	400	4	+	Petroselinum hortense
Zm00001d015290	Unnamed__4	CTCC	419	4	-	Petroselinum hortense
Zm00001d015290	Unnamed__4	CTCC	496	4	+	Petroselinum hortense
Zm00001d015290	Unnamed__4	CTCC	502	4	+	Petroselinum hortense
Zm00001d015290	Unnamed__4	CTCC	601	4	+	Petroselinum hortense
Zm00001d015290	Unnamed__4	CTCC	615	4	+	Petroselinum hortense
Zm00001d015290	Unnamed__4	CTCC	928	4	-	Petroselinum hortense
Zm00001d015290	Unnamed__4	CTCC	1473	4	+	Petroselinum hortense
Zm00001d015290	MYC	CATGTG	1109	6	+	Arabidopsis thaliana
Zm00001d015290	Myb	CAACTG	4	6	+	Arabidopsis thaliana
Zm00001d015290	Myb	CAACTG	758	6	+	Arabidopsis thaliana
Zm00001d015290	Myb	CAACTG	1079	6	+	Arabidopsis thaliana
Zm00001d015290	WRE3	CCACCT	204	6	+	Pisum sativum
Zm00001d015290	WRE3	CCACCT	387	6	+	Pisum sativum
Zm00001d015290	WRE3	CCACCT	582	6	+	Pisum sativum
Zm00001d015290	WRE3	CCACCT	607	6	+	Pisum sativum
Zm00001d016478	Unnamed__1	CGTGG	973	5	-	Zea mays
Zm00001d016478	Unnamed__1	CGTGG	1299	5	-	Zea mays
Zm00001d016478	ABRE4	CACGTA	845	6	+	Zea mays
Zm00001d016478	GT1-motif	GGTTAAT	139	7	+	Avena sativa	light responsive element
Zm00001d016478	W box	TTGACC	869	6	+	Arabidopsis thaliana
Zm00001d016478	WUN-motif	TTATTACAT	1173	9	-	Nicotiana glutinosa
Zm00001d016478	MYB	CAACCA	477	6	-	Arabidopsis thaliana
Zm00001d016478	G-box	TAACACGTAG	842	9	+	Brassica oleracea	cis-acting regulatory element involved in light responsiveness
Zm00001d016478	G-box	TACGTG	845	6	-	Arabidopsis thaliana	cis-acting regulatory element involved in light responsiveness
Zm00001d016478	G-box	CACGAC	974	6	+	Zea mays	cis-acting regulatory element involved in light responsiveness
Zm00001d016478	WRE3	CCACCT	941	6	+	Pisum sativum
Zm00001d016478	WRE3	CCACCT	1045	6	-	Pisum sativum
Zm00001d016478	WRE3	CCACCT	1089	6	-	Pisum sativum
Zm00001d016478	I-box	cCATATCCAAT	244	10	-	Flaveria trinervia	part of a light responsive element
Zm00001d016478	TCCC-motif	TCTCCCT	1345	7	+	Spinacia oleracea	part of a light responsive element
Zm00001d016478	LTR	CCGAAA	429	6	+	Hordeum vulgare	cis-acting element involved in low-temperature responsiveness
Zm00001d016478	MYC	CATGTG	25	6	-	Arabidopsis thaliana
Zm00001d016478	MYC	CATGTG	736	6	-	Arabidopsis thaliana
Zm00001d016478	MYC	CATTTG	771	6	+	Arabidopsis thaliana
Zm00001d016478	MYC	CATTTG	782	6	+	Arabidopsis thaliana
Zm00001d016478	Box 4	ATTAAT	117	6	+	Petroselinum crispum	part of a conserved DNA module involved in light responsiveness
Zm00001d016478	Box 4	ATTAAT	322	6	+	Petroselinum crispum	part of a conserved DNA module involved in light responsiveness
Zm00001d016478	Unnamed__4	CTCC	153	4	-	Petroselinum hortense
Zm00001d016478	Unnamed__4	CTCC	253	4	-	Petroselinum hortense
Zm00001d016478	Unnamed__4	CTCC	336	4	-	Petroselinum hortense
Zm00001d016478	Unnamed__4	CTCC	414	4	-	Petroselinum hortense
Zm00001d016478	Unnamed__4	CTCC	452	4	-	Petroselinum hortense
Zm00001d016478	Unnamed__4	CTCC	468	4	-	Petroselinum hortense
Zm00001d016478	Unnamed__4	CTCC	599	4	+	Petroselinum hortense
Zm00001d016478	Unnamed__4	CTCC	938	4	+	Petroselinum hortense
Zm00001d016478	Unnamed__4	CTCC	971	4	+	Petroselinum hortense
Zm00001d016478	Unnamed__4	CTCC	1035	4	-	Petroselinum hortense
Zm00001d016478	Unnamed__4	CTCC	1058	4	-	Petroselinum hortense
Zm00001d016478	Unnamed__4	CTCC	1073	4	-	Petroselinum hortense
Zm00001d016478	Unnamed__4	CTCC	1305	4	+	Petroselinum hortense
Zm00001d016478	Unnamed__4	CTCC	1341	4	+	Petroselinum hortense
Zm00001d016478	Unnamed__4	CTCC	1346	4	+	Petroselinum hortense
Zm00001d016478	Unnamed__4	CTCC	1386	4	+	Petroselinum hortense
Zm00001d016478	Unnamed__4	CTCC	1432	4	+	Petroselinum hortense
Zm00001d016478	Unnamed__4	CTCC	1454	4	+	Petroselinum hortense
Zm00001d016478	Unnamed__4	CTCC	1488	4	-	Petroselinum hortense
Zm00001d016478	O2-site	GATGACATGG	26	9	-	Zea mays	cis-acting regulatory element involved in zein metabolism regulation
Zm00001d016478		motif_sequence	109	4	+	organism	short_function
Zm00001d016478		motif_sequence	130	4	+	organism	short_function
Zm00001d016478		motif_sequence	253	4	-	organism	short_function
Zm00001d016478		motif_sequence	300	4	+	organism	short_function
Zm00001d016478		motif_sequence	330	4	-	organism	short_function
Zm00001d016478		motif_sequence	606	4	-	organism	short_function
Zm00001d016478		motif_sequence	636	4	-	organism	short_function
Zm00001d016478		motif_sequence	675	4	+	organism	short_function
Zm00001d016478		motif_sequence	679	4	-	organism	short_function
Zm00001d016478		motif_sequence	805	4	+	organism	short_function
Zm00001d016478		motif_sequence	1041	4	-	organism	short_function
Zm00001d016478		motif_sequence	1339	4	+	organism	short_function
Zm00001d016478		motif_sequence	1344	4	+	organism	short_function
Zm00001d016478		motif_sequence	1384	4	+	organism	short_function
Zm00001d016478		motif_sequence	1413	4	+	organism	short_function
Zm00001d016478		motif_sequence	1430	4	+	organism	short_function
Zm00001d016478	Sp1	GGGCGG	1331	6	-	Oryza sativa	light responsive element
Zm00001d016478	Sp1	GGGCGG	1422	6	-	Oryza sativa	light responsive element
Zm00001d016478	ABRE	ACGTG	845	5	-	Arabidopsis thaliana	cis-acting element involved in the abscisic acid responsiveness
Zm00001d016478	GC-motif	CCCCCG	1328	6	+	Zea mays	enhancer-like element involved in anoxic specific inducibility
Zm00001d016478	GC-motif	CCCCCG	1378	6	+	Zea mays	enhancer-like element involved in anoxic specific inducibility
Zm00001d016478	STRE	AGGGG	200	5	-	Arabidopsis thaliana
Zm00001d016478	STRE	AGGGG	434	5	+	Arabidopsis thaliana
Zm00001d016478	STRE	AGGGG	449	5	+	Arabidopsis thaliana
Zm00001d016478	STRE	AGGGG	1334	5	-	Arabidopsis thaliana
Zm00001d016478	TATA-box	TATA	187	4	+	Arabidopsis thaliana	core promoter element around -30 of transcription start
Zm00001d016478	TATA-box	TATA	530	4	+	Arabidopsis thaliana	core promoter element around -30 of transcription start
Zm00001d016478	TATA-box	TATA	696	4	+	Arabidopsis thaliana	core promoter element around -30 of transcription start
Zm00001d016478	TATA-box	TATAA	878	5	-	Arabidopsis thaliana	core promoter element around -30 of transcription start
Zm00001d016478	TATA-box	TATA	879	4	-	Arabidopsis thaliana	core promoter element around -30 of transcription start
Zm00001d016478	TATA-box	TATAAAA	1135	7	-	Pisum sativum	core promoter element around -30 of transcription start
Zm00001d016478	TATA-box	TATAAA	1136	6	-	Helianthus annuus	core promoter element around -30 of transcription start
Zm00001d016478	TATA-box	TATAA	1137	5	-	Arabidopsis thaliana	core promoter element around -30 of transcription start
Zm00001d016478	TATA-box	TATATTTATATTT	1138	12	+	Avena sativa	core promoter element around -30 of transcription start
Zm00001d016478	TATA-box	TACAAAA	1152	7	-	Oryza sativa	core promoter element around -30 of transcription start
Zm00001d016478	TATA-box	TATA	1211	4	-	Arabidopsis thaliana	core promoter element around -30 of transcription start
Zm00001d016478	TATA-box	ATTATA	1224	6	+	Brassica napus	core promoter element around -30 of transcription start
Zm00001d016478	TATA-box	TATAA	1225	5	-	Arabidopsis thaliana	core promoter element around -30 of transcription start
Zm00001d016478	TATA-box	TATA	1226	4	-	Arabidopsis thaliana	core promoter element around -30 of transcription start
Zm00001d016478	TATA-box	TATA	1469	4	-	Arabidopsis thaliana	core promoter element around -30 of transcription start
Zm00001d016478	CAAT-box	CAAT	3	4	-	Nicotiana glutinosa
Zm00001d016478	CAAT-box	CAAT	230	4	-	Nicotiana glutinosa
Zm00001d016478	CAAT-box	CCAAT	244	5	-	Arabidopsis thaliana	common cis-acting element in promoter and enhancer regions
Zm00001d016478	CAAT-box	CCAAT	518	5	-	Arabidopsis thaliana	common cis-acting element in promoter and enhancer regions
Zm00001d016478	CAAT-box	CCAAT	621	5	-	Arabidopsis thaliana	common cis-acting element in promoter and enhancer regions
Zm00001d016478	CAAT-box	CAAT	763	4	+	Nicotiana glutinosa
Zm00001d016478	CAAT-box	CAAAT	765	5	-	Pisum sativum	common cis-acting element in promoter and enhancer regions
Zm00001d016478	CAAT-box	CAAAT	772	5	-	Pisum sativum	common cis-acting element in promoter and enhancer regions
Zm00001d016478	CAAT-box	CAAAT	783	5	-	Pisum sativum	common cis-acting element in promoter and enhancer regions
Zm00001d016478	CAAT-box	CAAT	854	4	-	Nicotiana glutinosa
Zm00001d016478	CAAT-box	CAAT	887	4	+	Nicotiana glutinosa
Zm00001d016478	CAAT-box	CAAT	913	4	-	Nicotiana glutinosa
Zm00001d016478	CAAT-box	CCAAT	1110	5	-	Arabidopsis thaliana	common cis-acting element in promoter and enhancer regions
Zm00001d016478	CAAT-box	CAAT	1323	4	+	Nicotiana glutinosa
Zm00001d016478	CAAT-box	CAAT	1364	4	+	Nicotiana glutinosa
Zm00001d016478	ABRE3a	TACGTG	845	6	-	Zea mays
Zm00001d016478	DRE core	GCCGAC	1116	6	+	Arabidopsis thaliana
Zm00001d019699	GC-motif	CCCCCG	66	6	-	Zea mays	enhancer-like element involved in anoxic specific inducibility
Zm00001d019699	Myb-binding site	CAACAG	709	6	-	Nicotiana tabacum
Zm00001d019699	ABRE	CACGTG	15	6	+	Arabidopsis thaliana	cis-acting element involved in the abscisic acid responsiveness
Zm00001d019699	ABRE	ACGTG	16	5	+	Arabidopsis thaliana	cis-acting element involved in the abscisic acid responsiveness
Zm00001d019699	ABRE	ACGTG	405	5	-	Arabidopsis thaliana	cis-acting element involved in the abscisic acid responsiveness
Zm00001d019699	ABRE	CACGTG	889	6	-	Arabidopsis thaliana	cis-acting element involved in the abscisic acid responsiveness
Zm00001d019699	ABRE	ACGTG	890	5	+	Arabidopsis thaliana	cis-acting element involved in the abscisic acid responsiveness
Zm00001d019699	TGA-element	AACGAC	336	6	-	Brassica oleracea	auxin-responsive element
Zm00001d019699	Unnamed__2	CCCCGG	1041	6	-	Zea mays
Zm00001d019699	NON-box	AGATCGACG	361	9	-	Arabidopsis thaliana	cis-acting regulatory element related to meristem specific activation
Zm00001d019699	DRE core	GCCGAC	330	6	+	Arabidopsis thaliana
Zm00001d019699	CAAT-box	CAAT	130	4	+	Nicotiana glutinosa
Zm00001d019699	CAAT-box	CAAT	269	4	+	Nicotiana glutinosa
Zm00001d019699	CAAT-box	CCAAT	416	5	+	Arabidopsis thaliana	common cis-acting element in promoter and enhancer regions
Zm00001d019699	CAAT-box	CAAT	417	4	+	Nicotiana glutinosa
Zm00001d019699	CAAT-box	CAAAT	446	5	-	Pisum sativum	common cis-acting element in promoter and enhancer regions
Zm00001d019699	CAAT-box	CAAT	507	4	-	Nicotiana glutinosa
Zm00001d019699	CAAT-box	CCAAT	540	5	+	Arabidopsis thaliana	common cis-acting element in promoter and enhancer regions
Zm00001d019699	CAAT-box	CAAT	541	4	+	Nicotiana glutinosa
Zm00001d019699	CAAT-box	CAAT	554	4	-	Nicotiana glutinosa
Zm00001d019699	CAAT-box	CCAAT	583	5	-	Arabidopsis thaliana	common cis-acting element in promoter and enhancer regions
Zm00001d019699	CAAT-box	CAAAT	607	5	-	Pisum sativum	common cis-acting element in promoter and enhancer regions
Zm00001d019699	CAAT-box	CAAT	620	4	+	Nicotiana glutinosa
Zm00001d019699	CAAT-box	CAAT	721	4	+	Nicotiana glutinosa
Zm00001d019699	CAAT-box	CAAAT	809	5	+	Pisum sativum	common cis-acting element in promoter and enhancer regions
Zm00001d019699	CAAT-box	CAAT	1083	4	-	Nicotiana glutinosa
Zm00001d019699	CAAT-box	CAAT	1097	4	-	Nicotiana glutinosa
Zm00001d019699	CAAT-box	CAAT	1136	4	-	Nicotiana glutinosa
Zm00001d019699	CAAT-box	CAAAT	1167	5	-	Pisum sativum	common cis-acting element in promoter and enhancer regions
Zm00001d019699	CAAT-box	CAAAT	1195	5	-	Pisum sativum	common cis-acting element in promoter and enhancer regions
Zm00001d019699	CAAT-box	CAAAT	1343	5	-	Pisum sativum	common cis-acting element in promoter and enhancer regions
Zm00001d019699	MBS	CAACTG	715	6	-	Arabidopsis thaliana	MYB binding site involved in drought-inducibility
Zm00001d019699	G-Box	CACGTG	15	6	+	Pisum sativum	cis-acting regulatory element involved in light responsiveness
Zm00001d019699	G-Box	CACGTG	889	6	-	Pisum sativum	cis-acting regulatory element involved in light responsiveness
Zm00001d019699	TATA-box	TATAAAT	271	7	-	Brassica juncea	core promoter element around -30 of transcription start
Zm00001d019699	TATA-box	TATAAA	272	6	-	Helianthus annuus	core promoter element around -30 of transcription start
Zm00001d019699	TATA-box	TATAA	273	5	-	Arabidopsis thaliana	core promoter element around -30 of transcription start
Zm00001d019699	TATA-box	TATA	274	4	+	Arabidopsis thaliana	core promoter element around -30 of transcription start
Zm00001d019699	TATA-box	TATAA	454	5	-	Arabidopsis thaliana	core promoter element around -30 of transcription start
Zm00001d019699	TATA-box	TATA	455	4	+	Arabidopsis thaliana	core promoter element around -30 of transcription start
Zm00001d019699	TATA-box	TATAAAA	495	7	-	Pisum sativum	core promoter element around -30 of transcription start
Zm00001d019699	TATA-box	TATAAA	496	6	-	Helianthus annuus	core promoter element around -30 of transcription start
Zm00001d019699	TATA-box	TATAA	497	5	-	Arabidopsis thaliana	core promoter element around -30 of transcription start
Zm00001d019699	TATA-box	TATA	498	4	+	Arabidopsis thaliana	core promoter element around -30 of transcription start
Zm00001d019699	TATA-box	TATAAAT	644	7	-	Brassica juncea	core promoter element around -30 of transcription start
Zm00001d019699	TATA-box	TATAAA	645	6	-	Helianthus annuus	core promoter element around -30 of transcription start
Zm00001d019699	TATA-box	TATAA	646	5	-	Arabidopsis thaliana	core promoter element around -30 of transcription start
Zm00001d019699	TATA-box	TATA	647	4	+	Arabidopsis thaliana	core promoter element around -30 of transcription start
Zm00001d019699	TATA-box	TATTTAAA	1427	8	-	Arabidopsis thaliana	core promoter element around -30 of transcription start
Zm00001d019699	TATA-box	TATTTAAA	1437	8	-	Arabidopsis thaliana	core promoter element around -30 of transcription start
Zm00001d019699	TATA-box	ATATAA	1442	6	+	Brassica oleracea	core promoter element around -30 of transcription start
Zm00001d019699	TATA-box	TATA	1443	4	-	Arabidopsis thaliana	core promoter element around -30 of transcription start
Zm00001d019699	STRE	AGGGG	295	5	+	Arabidopsis thaliana
Zm00001d019699	Myb	CAACTG	715	6	-	Arabidopsis thaliana
Zm00001d019699	I-box	GTATAAGGCC	450	9	-	Larix laricina	part of a light responsive element
Zm00001d019699	WRE3	CCACCT	953	6	-	Pisum sativum
Zm00001d019699	Sp1	GGGCGG	298	6	+	Oryza sativa	light responsive element
Zm00001d019699	Sp1	GGGCGG	1044	6	+	Oryza sativa	light responsive element
Zm00001d019699		motif_sequence	146	4	-	organism	short_function
Zm00001d019699		motif_sequence	484	4	+	organism	short_function
Zm00001d019699		motif_sequence	653	4	+	organism	short_function
Zm00001d019699		motif_sequence	666	4	+	organism	short_function
Zm00001d019699		motif_sequence	770	4	-	organism	short_function
Zm00001d019699		motif_sequence	996	4	+	organism	short_function
Zm00001d019699		motif_sequence	1231	4	-	organism	short_function
Zm00001d019699		motif_sequence	1473	4	-	organism	short_function
Zm00001d019699		motif_sequence	1482	4	-	organism	short_function
Zm00001d019699	CGTCA-motif	CGTCA	191	5	+	Hordeum vulgare	cis-acting regulatory element involved in the MeJA-responsiveness
Zm00001d019699	CGTCA-motif	CGTCA	824	5	+	Hordeum vulgare	cis-acting regulatory element involved in the MeJA-responsiveness
Zm00001d019699	TC-rich repeats	ATTCTCTAAC	1296	9	-	Nicotiana tabacum	cis-acting element involved in defense and stress responsiveness
Zm00001d019699	TC-rich repeats	ATTCTCTAAC	1381	9	-	Nicotiana tabacum	cis-acting element involved in defense and stress responsiveness
Zm00001d019699	O2-site	GATGATGTGG	434	9	-	Zea mays	cis-acting regulatory element involved in zein metabolism regulation
Zm00001d019699	Unnamed__4	CTCC	48	4	-	Petroselinum hortense
Zm00001d019699	Unnamed__4	CTCC	199	4	+	Petroselinum hortense
Zm00001d019699	Unnamed__4	CTCC	245	4	+	Petroselinum hortense
Zm00001d019699	Unnamed__4	CTCC	833	4	+	Petroselinum hortense
Zm00001d019699	Unnamed__4	CTCC	910	4	-	Petroselinum hortense
Zm00001d019699	Unnamed__4	CTCC	951	4	-	Petroselinum hortense
Zm00001d019699	Unnamed__4	CTCC	973	4	-	Petroselinum hortense
Zm00001d019699	Unnamed__4	CTCC	1171	4	-	Petroselinum hortense
Zm00001d019699	Unnamed__4	CTCC	1239	4	+	Petroselinum hortense
Zm00001d019699	MYC	CATTTG	606	6	+	Arabidopsis thaliana
Zm00001d019699	MYB	CAACAG	709	6	-	Arabidopsis thaliana
Zm00001d019699	MYB	TAACCA	941	6	-	Arabidopsis thaliana
Zm00001d019699	MYB	TAACCA	1063	6	-	Arabidopsis thaliana
Zm00001d019699	ERE	ATTTTAAA	1337	8	-	Nicotiana glutinos
Zm00001d019699	W box	TTGACC	340	6	+	Arabidopsis thaliana
Zm00001d019699	W box	TTGACC	399	6	+	Arabidopsis thaliana
Zm00001d019699	W box	TTGACC	448	6	+	Arabidopsis thaliana
Zm00001d019699	GT1-motif	GGTTAA	1204	6	+	Arabidopsis thaliana	light responsive element
Zm00001d019699	G-box	CACGTG	15	6	+	Arabidopsis thaliana	cis-acting regulatory element involved in light responsiveness
Zm00001d019699	G-box	CACGTC	405	6	+	Zea mays	cis-acting regulatory element involved in light responsiveness
Zm00001d019699	G-box	CACGAC	611	6	-	Zea mays	cis-acting regulatory element involved in light responsiveness
Zm00001d019699	G-box	CACGTG	889	6	-	Arabidopsis thaliana	cis-acting regulatory element involved in light responsiveness
Zm00001d019699	G-box	CACGAC	931	6	-	Zea mays	cis-acting regulatory element involved in light responsiveness
Zm00001d019699	TCT-motif	TCTTAC	1141	6	-	Arabidopsis thaliana	part of a light responsive element
Zm00001d019699	JERE	AGACCGCC	53	8	-	Arabidopsis thaliana
Zm00001d019699	Myc	TCTCTTA	1142	7	-	Arabidopsis thaliana
Zm00001d019699	CAT-box	GCCACT	50	6	-	Arabidopsis thaliana	cis-acting regulatory element related to meristem expression
Zm00001d019699	Unnamed__1	CGTGG	404	5	-	Zea mays
Zm00001d019699	Unnamed__1	CGTGG	613	5	+	Zea mays
Zm00001d019699	Unnamed__1	CGTGG	891	5	+	Zea mays
Zm00001d019699	Unnamed__1	CGTGG	933	5	+	Zea mays
Zm00001d019699	Unnamed__1	CGTGG	948	5	+	Zea mays
Zm00001d019699	Unnamed__1	CGTGG	1254	5	+	Zea mays
Zm00001d019699	MYB-like sequence	TAACCA	941	6	-	Arabidopsis thaliana
Zm00001d019699	MYB-like sequence	TAACCA	1063	6	-	Arabidopsis thaliana
Zm00001d019699	TGACG-motif	TGACG	191	5	-	Hordeum vulgare	cis-acting regulatory element involved in the MeJA-responsiveness
Zm00001d019699	TGACG-motif	TGACG	824	5	-	Hordeum vulgare	cis-acting regulatory element involved in the MeJA-responsiveness
Zm00001d019699	GATA-motif	AAGGATAAGG	452	9	-	Solanum tuberosum	part of a light responsive element
Zm00001d019699	as-1	TGACG	191	5	-	Arabidopsis thaliana
Zm00001d019699	as-1	TGACG	824	5	-	Arabidopsis thaliana
Zm00001d033620	Box 4	ATTAAT	630	6	+	Petroselinum crispum	part of a conserved DNA module involved in light responsiveness
Zm00001d033620	MBSI	TTTTTACGGTTA	1441	11	+	Petunia hybrida	MYB binding site involved in flavonoid biosynthetic genes regulation
Zm00001d033620	Unnamed__4	CTCC	16	4	+	Petroselinum hortense
Zm00001d033620	Unnamed__4	CTCC	95	4	-	Petroselinum hortense
Zm00001d033620	Unnamed__4	CTCC	605	4	+	Petroselinum hortense
Zm00001d033620	Unnamed__4	CTCC	829	4	-	Petroselinum hortense
Zm00001d033620	Unnamed__4	CTCC	893	4	+	Petroselinum hortense
Zm00001d033620	Unnamed__4	CTCC	901	4	-	Petroselinum hortense
Zm00001d033620	Unnamed__4	CTCC	936	4	+	Petroselinum hortense
Zm00001d033620	Unnamed__4	CTCC	954	4	+	Petroselinum hortense
Zm00001d033620	Unnamed__4	CTCC	997	4	-	Petroselinum hortense
Zm00001d033620	Unnamed__4	CTCC	1092	4	-	Petroselinum hortense
Zm00001d033620	Unnamed__4	CTCC	1156	4	-	Petroselinum hortense
Zm00001d033620	Unnamed__4	CTCC	1226	4	-	Petroselinum hortense
Zm00001d033620	Unnamed__4	CTCC	1240	4	-	Petroselinum hortense
Zm00001d033620	Unnamed__4	CTCC	1267	4	-	Petroselinum hortense
Zm00001d033620	Unnamed__4	CTCC	1274	4	-	Petroselinum hortense
Zm00001d033620	Unnamed__4	CTCC	1295	4	-	Petroselinum hortense
Zm00001d033620	Unnamed__4	CTCC	1330	4	-	Petroselinum hortense
Zm00001d033620	Unnamed__4	CTCC	1377	4	+	Petroselinum hortense
Zm00001d033620	Unnamed__4	CTCC	1476	4	+	Petroselinum hortense
Zm00001d033620	MYC	CATTTG	389	6	+	Arabidopsis thaliana
Zm00001d033620	MYC	CATTTG	436	6	-	Arabidopsis thaliana
Zm00001d033620	MYC	CATGTG	709	6	+	Arabidopsis thaliana
Zm00001d033620	MYC	CATGTG	1461	6	-	Arabidopsis thaliana
Zm00001d033620	Sp1	GGGCGG	1109	6	-	Oryza sativa	light responsive element
Zm00001d033620	CCGTCC-box	CCGTCC	852	6	-	Petroselinum hortense
Zm00001d033620	CCGTCC-box	CCGTCC	1181	6	+	Petroselinum hortense
Zm00001d033620	chs-Unit 1 m1	ACCTAACCCGG	1244	10	-	Zea mays	part of a light responsive element
Zm00001d033620		motif_sequence	63	4	+	organism	short_function
Zm00001d033620		motif_sequence	150	4	+	organism	short_function
Zm00001d033620		motif_sequence	155	4	+	organism	short_function
Zm00001d033620		motif_sequence	178	4	+	organism	short_function
Zm00001d033620		motif_sequence	230	4	+	organism	short_function
Zm00001d033620		motif_sequence	241	4	+	organism	short_function
Zm00001d033620		motif_sequence	487	4	+	organism	short_function
Zm00001d033620		motif_sequence	794	4	-	organism	short_function
Zm00001d033620		motif_sequence	891	4	+	organism	short_function
Zm00001d033620		motif_sequence	934	4	+	organism	short_function
Zm00001d033620		motif_sequence	965	4	-	organism	short_function
Zm00001d033620		motif_sequence	1267	4	-	organism	short_function
Zm00001d033620		motif_sequence	1330	4	-	organism	short_function
Zm00001d033620		motif_sequence	1380	4	+	organism	short_function
Zm00001d033620	CGTCA-motif	CGTCA	728	5	+	Hordeum vulgare	cis-acting regulatory element involved in the MeJA-responsiveness
Zm00001d033620	WRE3	CCACCT	1172	6	+	Pisum sativum
Zm00001d033620	WRE3	CCACCT	1276	6	-	Pisum sativum
Zm00001d033620	Myb	CAACTG	1417	6	-	Arabidopsis thaliana
Zm00001d033620	ABRE3a	TACGTG	816	6	-	Zea mays
Zm00001d033620	CAAT-box	CAAT	26	4	-	Nicotiana glutinosa
Zm00001d033620	CAAT-box	CAAAT	74	5	+	Pisum sativum	common cis-acting element in promoter and enhancer regions
Zm00001d033620	CAAT-box	CAAT	148	4	+	Nicotiana glutinosa
Zm00001d033620	CAAT-box	CAAT	367	4	-	Nicotiana glutinosa
Zm00001d033620	CAAT-box	CAAAT	390	5	-	Pisum sativum	common cis-acting element in promoter and enhancer regions
Zm00001d033620	CAAT-box	CAAAT	436	5	+	Pisum sativum	common cis-acting element in promoter and enhancer regions
Zm00001d033620	CAAT-box	CAAAT	449	5	-	Pisum sativum	common cis-acting element in promoter and enhancer regions
Zm00001d033620	CAAT-box	CAAAT	463	5	-	Pisum sativum	common cis-acting element in promoter and enhancer regions
Zm00001d033620	CAAT-box	CAAT	468	4	-	Nicotiana glutinosa
Zm00001d033620	CAAT-box	CAAT	556	4	+	Nicotiana glutinosa
Zm00001d033620	CAAT-box	CAAAT	660	5	+	Pisum sativum	common cis-acting element in promoter and enhancer regions
Zm00001d033620	CAAT-box	CAAT	734	4	+	Nicotiana glutinosa
Zm00001d033620	CAAT-box	CAAAT	736	5	-	Pisum sativum	common cis-acting element in promoter and enhancer regions
Zm00001d033620	CAAT-box	CAAAT	762	5	+	Pisum sativum	common cis-acting element in promoter and enhancer regions
Zm00001d033620	CAAT-box	CAAAT	888	5	+	Pisum sativum	common cis-acting element in promoter and enhancer regions
Zm00001d033620	CAAT-box	CAAAT	1400	5	-	Pisum sativum	common cis-acting element in promoter and enhancer regions
Zm00001d033620	CAAT-box	CAAAT	1432	5	+	Pisum sativum	common cis-acting element in promoter and enhancer regions
Zm00001d033620	CAAT-box	CAAAT	1483	5	+	Pisum sativum	common cis-acting element in promoter and enhancer regions
Zm00001d033620	MBS	CAACTG	1417	6	-	Arabidopsis thaliana	MYB binding site involved in drought-inducibility
Zm00001d033620	TATA-box	TATA	252	4	+	Arabidopsis thaliana	core promoter element around -30 of transcription start
Zm00001d033620	TATA-box	TATA	324	4	+	Arabidopsis thaliana	core promoter element around -30 of transcription start
Zm00001d033620	TATA-box	ATATAT	361	6	+	Brassica napus	core promoter element around -30 of transcription start
Zm00001d033620	TATA-box	TATATA	362	6	+	Arabidopsis thaliana	core promoter element around -30 of transcription start
Zm00001d033620	TATA-box	ATATAT	363	6	+	Brassica napus	core promoter element around -30 of transcription start
Zm00001d033620	TATA-box	TATA	364	4	+	Arabidopsis thaliana	core promoter element around -30 of transcription start
Zm00001d033620	TATA-box	TATA	445	4	+	Arabidopsis thaliana	core promoter element around -30 of transcription start
Zm00001d033620	TATA-box	TATA	616	4	+	Arabidopsis thaliana	core promoter element around -30 of transcription start
Zm00001d033620	TATA-box	ATTATA	718	6	+	Brassica napus	core promoter element around -30 of transcription start
Zm00001d033620	TATA-box	TATAA	719	5	-	Arabidopsis thaliana	core promoter element around -30 of transcription start
Zm00001d033620	TATA-box	TATA	720	4	+	Arabidopsis thaliana	core promoter element around -30 of transcription start
Zm00001d033620	DRE core	GCCGAC	1162	6	-	Arabidopsis thaliana
Zm00001d033620	DRE core	GCCGAC	1289	6	-	Arabidopsis thaliana
Zm00001d033620	ABRE	ACGTG	816	5	-	Arabidopsis thaliana	cis-acting element involved in the abscisic acid responsiveness
Zm00001d033620	ABRE	CGTACGTGCA	818	9	+	Hordeum vulgare	cis-acting element involved in the abscisic acid responsiveness
Zm00001d033620	ABRE	GCCGCGTGGC	1229	9	+	Oryza sativa	cis-acting element involved in the abscisic acid responsiveness
Zm00001d033620	TGA-element	AACGAC	131	6	+	Brassica oleracea	auxin-responsive element
Zm00001d033620	TGA-element	AACGAC	782	6	-	Brassica oleracea	auxin-responsive element
Zm00001d033620	Unnamed__2	CCCCGG	848	6	-	Zea mays
Zm00001d033620	Unnamed__2	CCCCGG	1371	6	+	Zea mays
Zm00001d033620	GC-motif	CCCCCG	921	6	+	Zea mays	enhancer-like element involved in anoxic specific inducibility
Zm00001d033620	A-box	CCGTCC	852	6	-	Petroselinum crispum	cis-acting regulatory element
Zm00001d033620	A-box	CCGTCC	1181	6	+	Petroselinum crispum	cis-acting regulatory element
Zm00001d033620	Unnamed__1	CGTGG	85	5	-	Zea mays
Zm00001d033620	Unnamed__1	CGTGG	510	5	-	Zea mays
Zm00001d033620	Unnamed__1	CGTGG	984	5	-	Zea mays
Zm00001d033620	Unnamed__1	CGTGG	1012	5	-	Zea mays
Zm00001d033620	Unnamed__1	CGTGG	1185	5	-	Zea mays
Zm00001d033620	Unnamed__1	CGTGG	1233	5	+	Zea mays
Zm00001d033620	Unnamed__1	CGTGG	1423	5	-	Zea mays
Zm00001d033620	ABRE4	CACGTA	816	6	+	Zea mays
Zm00001d033620	MYB-like sequence	TAACCA	52	6	-	Arabidopsis thaliana
Zm00001d033620	MYB-like sequence	TAACCA	559	6	+	Arabidopsis thaliana
Zm00001d033620	MYB-like sequence	TAACCA	699	6	+	Arabidopsis thaliana
Zm00001d033620	TGACG-motif	TGACG	728	5	-	Hordeum vulgare	cis-acting regulatory element involved in the MeJA-responsiveness
Zm00001d033620	as-1	TGACG	728	5	-	Arabidopsis thaliana
Zm00001d033620	GTGGC-motif	GATTCTGTGGC	688	10	-	Spinacia oleracea	part of a light responsive element
Zm00001d033620	TCT-motif	TCTTAC	491	6	+	Arabidopsis thaliana	part of a light responsive element
Zm00001d033620	G-box	CACGAC	86	6	+	Zea mays	cis-acting regulatory element involved in light responsiveness
Zm00001d033620	G-box	TAACACGTAG	813	9	+	Brassica oleracea	cis-acting regulatory element involved in light responsiveness
Zm00001d033620	G-box	TACGTG	816	6	-	Arabidopsis thaliana	cis-acting regulatory element involved in light responsiveness
Zm00001d033620	G-box	CACGAC	1186	6	+	Zea mays	cis-acting regulatory element involved in light responsiveness
Zm00001d033620	G-box	GCCACGTGGA	1229	9	+	Arabidopsis thaliana	cis-acting regulatory element involved in light responsiveness
Zm00001d033620	AAGAA-motif	GAAAGAA	35	7	-	Avena sativa
Zm00001d033620	CCGTCC motif	CCGTCC	852	6	-	Nicotiana tabacum
Zm00001d033620	CCGTCC motif	CCGTCC	1181	6	+	Nicotiana tabacum
Zm00001d033620	W box	TTGACC	294	6	+	Arabidopsis thaliana
Zm00001d033620	W box	TTGACC	597	6	+	Arabidopsis thaliana
Zm00001d033620	AT~TATA-box	TATATA	362	6	+	Arabidopsis thaliana
Zm00001d033620	MYB	TAACCA	52	6	-	Arabidopsis thaliana
Zm00001d033620	MYB	TAACCA	559	6	+	Arabidopsis thaliana
Zm00001d033620	MYB	TAACCA	699	6	+	Arabidopsis thaliana
Zm00001d037455	ERE	ATTTTAAA	1392	8	-	Nicotiana glutinos
Zm00001d037455	MYB	CAACCA	162	6	+	Arabidopsis thaliana
Zm00001d037455	MYB	CAACCA	562	6	-	Arabidopsis thaliana
Zm00001d037455	WUN-motif	AAATTTCTT	443	9	-	Nicotiana glutinosa
Zm00001d037455	ABRE	GCAACGTGTC	179	9	+	Hordeum vulgare	cis-acting element involved in the abscisic acid responsiveness
Zm00001d037455	W box	TTGACC	133	6	-	Arabidopsis thaliana
Zm00001d037455	W box	TTGACC	603	6	-	Arabidopsis thaliana
Zm00001d037455	CCAAT-box	CAACGG	308	6	+	Hordeum vulgare	MYBHv1 binding site
Zm00001d037455	TATA-box	TATA	457	4	+	Arabidopsis thaliana	core promoter element around -30 of transcription start
Zm00001d037455	TATA-box	TATA	551	4	+	Arabidopsis thaliana	core promoter element around -30 of transcription start
Zm00001d037455	TATA-box	TATA	921	4	-	Arabidopsis thaliana	core promoter element around -30 of transcription start
Zm00001d037455	TATA-box	TATA	932	4	-	Arabidopsis thaliana	core promoter element around -30 of transcription start
Zm00001d037455	TATA-box	ATTATA	1111	6	+	Brassica napus	core promoter element around -30 of transcription start
Zm00001d037455	TATA-box	TATAA	1112	5	-	Arabidopsis thaliana	core promoter element around -30 of transcription start
Zm00001d037455	TATA-box	TATA	1113	4	-	Arabidopsis thaliana	core promoter element around -30 of transcription start
Zm00001d037455	TATA-box	ATTATA	1126	6	+	Brassica napus	core promoter element around -30 of transcription start
Zm00001d037455	TATA-box	TATAA	1127	5	-	Arabidopsis thaliana	core promoter element around -30 of transcription start
Zm00001d037455	TATA-box	TATA	1128	4	-	Arabidopsis thaliana	core promoter element around -30 of transcription start
Zm00001d037455	TATA-box	TATAA	1144	5	-	Arabidopsis thaliana	core promoter element around -30 of transcription start
Zm00001d037455	TATA-box	TATA	1145	4	-	Arabidopsis thaliana	core promoter element around -30 of transcription start
Zm00001d037455	TATA-box	TATTTAAA	1215	8	-	Arabidopsis thaliana	core promoter element around -30 of transcription start
Zm00001d037455	TATA-box	ATATAT	1318	6	-	Brassica napus	core promoter element around -30 of transcription start
Zm00001d037455	TATA-box	TATA	1319	4	-	Arabidopsis thaliana	core promoter element around -30 of transcription start
Zm00001d037455	TATA-box	TATA	1416	4	-	Arabidopsis thaliana	core promoter element around -30 of transcription start
Zm00001d037455	TATA-box	TATA	1467	4	-	Arabidopsis thaliana	core promoter element around -30 of transcription start
Zm00001d037455	TCT-motif	TCTTAC	441	6	-	Arabidopsis thaliana	part of a light responsive element
Zm00001d037455	STRE	AGGGG	673	5	-	Arabidopsis thaliana
Zm00001d037455	STRE	AGGGG	728	5	+	Arabidopsis thaliana
Zm00001d037455	CAAT-box	CCAAT	331	5	-	Arabidopsis thaliana	common cis-acting element in promoter and enhancer regions
Zm00001d037455	CAAT-box	CCAAT	437	5	-	Arabidopsis thaliana	common cis-acting element in promoter and enhancer regions
Zm00001d037455	CAAT-box	CCAAT	805	5	+	Arabidopsis thaliana	common cis-acting element in promoter and enhancer regions
Zm00001d037455	CAAT-box	CAAT	806	4	+	Nicotiana glutinosa
Zm00001d037455	CAAT-box	CAAT	817	4	+	Nicotiana glutinosa
Zm00001d037455	CAAT-box	CAAAT	846	5	-	Pisum sativum	common cis-acting element in promoter and enhancer regions
Zm00001d037455	CAAT-box	CAAT	856	4	-	Nicotiana glutinosa
Zm00001d037455	CAAT-box	CAAT	884	4	-	Nicotiana glutinosa
Zm00001d037455	CAAT-box	CCAAT	1008	5	+	Arabidopsis thaliana	common cis-acting element in promoter and enhancer regions
Zm00001d037455	CAAT-box	CAAT	1009	4	+	Nicotiana glutinosa
Zm00001d037455	CAAT-box	CAAT	1233	4	+	Nicotiana glutinosa
Zm00001d037455	CAAT-box	CAAT	1272	4	+	Nicotiana glutinosa
Zm00001d037455	CAAT-box	CAAT	1322	4	-	Nicotiana glutinosa
Zm00001d037455	CAAT-box	CCAAT	1343	5	+	Arabidopsis thaliana	common cis-acting element in promoter and enhancer regions
Zm00001d037455	CAAT-box	CAAT	1344	4	+	Nicotiana glutinosa
Zm00001d037455	CAAT-box	AGCTCAATTTCA	1380	11	-	Daucus carota	common cis-acting element in promoter and enhancer regions
Zm00001d037455	CAAT-box	CAAT	1384	4	-	Nicotiana glutinosa
Zm00001d037455	CAAT-box	CAAAT	1447	5	-	Pisum sativum	common cis-acting element in promoter and enhancer regions
Zm00001d037455	TCA-element	CCATCTTTTT	125	9	-	Nicotiana tabacum	cis-acting element involved in salicylic acid responsiveness
Zm00001d037455	I-box	gGATAAGGTG	346	9	-	Zea mays	part of a light responsive element
Zm00001d037455	WRE3	CCACCT	1063	6	-	Pisum sativum
Zm00001d037455	GATA-motif	AAGGATAAGG	348	9	-	Solanum tuberosum	part of a light responsive element
Zm00001d037455		motif_sequence	184	4	+	organism	short_function
Zm00001d037455		motif_sequence	899	4	-	organism	short_function
Zm00001d037455		motif_sequence	1369	4	-	organism	short_function
Zm00001d037455	ARE	AAACCA	7	6	-	Zea mays	cis-acting regulatory element essential for the anaerobic induction
Zm00001d037455	ARE	AAACCA	879	6	+	Zea mays	cis-acting regulatory element essential for the anaerobic induction
Zm00001d037455	MYB recognition site	CCGTTG	308	6	-	Arabidopsis thaliana
Zm00001d037455	Unnamed__4	CTCC	173	4	-	Petroselinum hortense
Zm00001d037455	Unnamed__4	CTCC	244	4	-	Petroselinum hortense
Zm00001d037455	Unnamed__4	CTCC	269	4	-	Petroselinum hortense
Zm00001d037455	Unnamed__4	CTCC	272	4	-	Petroselinum hortense
Zm00001d037455	Unnamed__4	CTCC	525	4	-	Petroselinum hortense
Zm00001d037455	Unnamed__4	CTCC	726	4	-	Petroselinum hortense
Zm00001d037455	Unnamed__4	CTCC	753	4	-	Petroselinum hortense
Zm00001d037455	Unnamed__4	CTCC	756	4	-	Petroselinum hortense
Zm00001d037455	Unnamed__4	CTCC	802	4	+	Petroselinum hortense
Zm00001d037455	Unnamed__4	CTCC	899	4	-	Petroselinum hortense
Zm00001d037455	Unnamed__4	CTCC	946	4	+	Petroselinum hortense
Zm00001d037455	Unnamed__4	CTCC	971	4	+	Petroselinum hortense
Zm00001d037455	Unnamed__4	CTCC	1039	4	-	Petroselinum hortense
Zm00001d037455	Unnamed__4	CTCC	1099	4	+	Petroselinum hortense
Zm00001d037455	MRE	AACCTAA	215	7	-	Petroselinum crispum	MYB binding site involved in light responsiveness
Zm00001d037455	MRE	AACCTAA	868	7	+	Petroselinum crispum	MYB binding site involved in light responsiveness
Zm00001d041124	AE-box	AGAAACTT	1325	8	-	Arabidopsis thaliana	part of a module for light response
Zm00001d041124	G-box	CACGTG	1387	6	-	Arabidopsis thaliana	cis-acting regulatory element involved in light responsiveness
Zm00001d041124	GT1-motif	GTGTGTGAA	723	9	+	Solanum tuberosum	light responsive element
Zm00001d041124	WUN-motif	TAATTACTC	800	9	-	Nicotiana glutinosa
Zm00001d041124	MYB	TAACCA	337	6	+	Arabidopsis thaliana
Zm00001d041124	MYB	CAACCA	470	6	-	Arabidopsis thaliana
Zm00001d041124	MYB	TAACCA	645	6	-	Arabidopsis thaliana
Zm00001d041124	MYB	CAACCA	1379	6	-	Arabidopsis thaliana
Zm00001d041124	MRE	AACCTAA	562	7	+	Petroselinum crispum	MYB binding site involved in light responsiveness
Zm00001d041124	ARE	AAACCA	352	6	+	Zea mays	cis-acting regulatory element essential for the anaerobic induction
Zm00001d041124	as-1	TGACG	962	5	-	Arabidopsis thaliana
Zm00001d041124	TGACG-motif	TGACG	962	5	-	Hordeum vulgare	cis-acting regulatory element involved in the MeJA-responsiveness
Zm00001d041124	MYB-like sequence	TAACCA	337	6	+	Arabidopsis thaliana
Zm00001d041124	MYB-like sequence	TAACCA	645	6	-	Arabidopsis thaliana
Zm00001d041124	TCA-element	CCATCTTTTT	280	9	+	Nicotiana tabacum	cis-acting element involved in salicylic acid responsiveness
Zm00001d041124	MBS	CAACTG	1360	6	-	Arabidopsis thaliana	MYB binding site involved in drought-inducibility
Zm00001d041124	CAAT-box	CAAT	73	4	-	Nicotiana glutinosa
Zm00001d041124	CAAT-box	CAAAT	124	5	-	Pisum sativum	common cis-acting element in promoter and enhancer regions
Zm00001d041124	CAAT-box	CAAT	134	4	+	Nicotiana glutinosa
Zm00001d041124	CAAT-box	CAAT	359	4	-	Nicotiana glutinosa
Zm00001d041124	CAAT-box	CAAT	459	4	+	Nicotiana glutinosa
Zm00001d041124	CAAT-box	CAAT	498	4	-	Nicotiana glutinosa
Zm00001d041124	CAAT-box	CCAAT	527	5	+	Arabidopsis thaliana	common cis-acting element in promoter and enhancer regions
Zm00001d041124	CAAT-box	CAAT	528	4	+	Nicotiana glutinosa
Zm00001d041124	CAAT-box	CAAT	532	4	+	Nicotiana glutinosa
Zm00001d041124	CAAT-box	CAAAT	534	5	-	Pisum sativum	common cis-acting element in promoter and enhancer regions
Zm00001d041124	CAAT-box	CAAAT	583	5	+	Pisum sativum	common cis-acting element in promoter and enhancer regions
Zm00001d041124	CAAT-box	CAAAT	717	5	+	Pisum sativum	common cis-acting element in promoter and enhancer regions
Zm00001d041124	CAAT-box	CAAT	976	4	+	Nicotiana glutinosa
Zm00001d041124	CAAT-box	CAAT	1063	4	+	Nicotiana glutinosa
Zm00001d041124	CAAT-box	CAAAT	1103	5	-	Pisum sativum	common cis-acting element in promoter and enhancer regions
Zm00001d041124	CAAT-box	CAAAT	1197	5	-	Pisum sativum	common cis-acting element in promoter and enhancer regions
Zm00001d041124	CAAT-box	CCAAT	1212	5	+	Arabidopsis thaliana	common cis-acting element in promoter and enhancer regions
Zm00001d041124	CAAT-box	CAAT	1213	4	+	Nicotiana glutinosa
Zm00001d041124	CAAT-box	CAAT	1277	4	-	Nicotiana glutinosa
Zm00001d041124	STRE	AGGGG	742	5	+	Arabidopsis thaliana
Zm00001d041124	STRE	AGGGG	893	5	+	Arabidopsis thaliana
Zm00001d041124	STRE	AGGGG	906	5	+	Arabidopsis thaliana
Zm00001d041124	STRE	AGGGG	1245	5	-	Arabidopsis thaliana
Zm00001d041124	STRE	AGGGG	1399	5	-	Arabidopsis thaliana
Zm00001d041124	G-Box	CACGTT	759	6	+	Pisum sativum	cis-acting regulatory element involved in light responsiveness
Zm00001d041124	G-Box	CACGTG	1387	6	-	Pisum sativum	cis-acting regulatory element involved in light responsiveness
Zm00001d041124	TATA-box	TACATAAA	19	8	+	Oryza sativa	core promoter element around -30 of transcription start
Zm00001d041124	TATA-box	ATATAA	29	6	+	Brassica oleracea	core promoter element around -30 of transcription start
Zm00001d041124	TATA-box	TATA	30	4	+	Arabidopsis thaliana	core promoter element around -30 of transcription start
Zm00001d041124	TATA-box	TATTTAAA	42	8	+	Arabidopsis thaliana	core promoter element around -30 of transcription start
Zm00001d041124	TATA-box	TATTTAAA	44	8	-	Arabidopsis thaliana	core promoter element around -30 of transcription start
Zm00001d041124	TATA-box	TATAAA	53	6	-	Helianthus annuus	core promoter element around -30 of transcription start
Zm00001d041124	TATA-box	TATAA	54	5	-	Arabidopsis thaliana	core promoter element around -30 of transcription start
Zm00001d041124	TATA-box	TATA	55	4	+	Arabidopsis thaliana	core promoter element around -30 of transcription start
Zm00001d041124	TATA-box	TATACA	100	6	-	Helianthus annuus	core promoter element around -30 of transcription start
Zm00001d041124	TATA-box	TATA	102	4	+	Arabidopsis thaliana	core promoter element around -30 of transcription start
Zm00001d041124	TATA-box	TATA	167	4	+	Arabidopsis thaliana	core promoter element around -30 of transcription start
Zm00001d041124	TATA-box	TATAA	268	5	-	Arabidopsis thaliana	core promoter element around -30 of transcription start
Zm00001d041124	TATA-box	TATA	269	4	+	Arabidopsis thaliana	core promoter element around -30 of transcription start
Zm00001d041124	TATA-box	TATA	320	4	+	Arabidopsis thaliana	core promoter element around -30 of transcription start
Zm00001d041124	TATA-box	TACAAAA	389	7	+	Oryza sativa	core promoter element around -30 of transcription start
Zm00001d041124	TATA-box	TATA	453	4	+	Arabidopsis thaliana	core promoter element around -30 of transcription start
Zm00001d041124	TATA-box	ATATAT	968	6	-	Brassica napus	core promoter element around -30 of transcription start
Zm00001d041124	TATA-box	TATA	969	4	-	Arabidopsis thaliana	core promoter element around -30 of transcription start
Zm00001d041124	TATA-box	TATA	999	4	-	Arabidopsis thaliana	core promoter element around -30 of transcription start
Zm00001d041124	TATA-box	ATTATA	1008	6	+	Brassica napus	core promoter element around -30 of transcription start
Zm00001d041124	TATA-box	TATAA	1009	5	-	Arabidopsis thaliana	core promoter element around -30 of transcription start
Zm00001d041124	TATA-box	TATA	1010	4	-	Arabidopsis thaliana	core promoter element around -30 of transcription start
Zm00001d041124	TATA-box	ATTATA	1055	6	+	Brassica napus	core promoter element around -30 of transcription start
Zm00001d041124	TATA-box	TATAA	1056	5	-	Arabidopsis thaliana	core promoter element around -30 of transcription start
Zm00001d041124	TATA-box	TATA	1057	4	-	Arabidopsis thaliana	core promoter element around -30 of transcription start
Zm00001d041124	TATA-box	TATTTAAA	1174	8	-	Arabidopsis thaliana	core promoter element around -30 of transcription start
Zm00001d041124	TATA-box	ATTATA	1184	6	+	Brassica napus	core promoter element around -30 of transcription start
Zm00001d041124	TATA-box	TATAA	1185	5	-	Arabidopsis thaliana	core promoter element around -30 of transcription start
Zm00001d041124	TATA-box	TATA	1186	4	-	Arabidopsis thaliana	core promoter element around -30 of transcription start
Zm00001d041124	Unnamed__2	AACCTAACCT	562	9	+	Petroselinum hortense
Zm00001d041124	TGA-element	AACGAC	1148	6	-	Brassica oleracea	auxin-responsive element
Zm00001d041124	ABRE	ACGTG	759	5	-	Arabidopsis thaliana	cis-acting element involved in the abscisic acid responsiveness
Zm00001d041124	ABRE	CACGTG	1387	6	-	Arabidopsis thaliana	cis-acting element involved in the abscisic acid responsiveness
Zm00001d041124	ABRE	ACGTG	1388	5	+	Arabidopsis thaliana	cis-acting element involved in the abscisic acid responsiveness
Zm00001d041124	ATC-motif	AGTAATCT	1287	8	+	Spinacia oleracea	part of a conserved DNA module involved in light responsiveness
Zm00001d041124	TC-rich repeats	ATTCTCTAAC	626	9	+	Nicotiana tabacum	cis-acting element involved in defense and stress responsiveness
Zm00001d041124	MYC	CATTTG	583	6	-	Arabidopsis thaliana
Zm00001d041124	MYC	CATGTG	1083	6	+	Arabidopsis thaliana
Zm00001d041124	MYC	CATTTG	1102	6	+	Arabidopsis thaliana
Zm00001d041124	Box 4	ATTAAT	384	6	+	Petroselinum crispum	part of a conserved DNA module involved in light responsiveness
Zm00001d041124	Box 4	ATTAAT	1118	6	-	Petroselinum crispum	part of a conserved DNA module involved in light responsiveness
Zm00001d041124	Box 4	ATTAAT	1273	6	-	Petroselinum crispum	part of a conserved DNA module involved in light responsiveness
Zm00001d041124	Unnamed__4	CTCC	6	4	-	Petroselinum hortense
Zm00001d041124	Unnamed__4	CTCC	162	4	+	Petroselinum hortense
Zm00001d041124	Unnamed__4	CTCC	614	4	+	Petroselinum hortense
Zm00001d041124	Unnamed__4	CTCC	635	4	+	Petroselinum hortense
Zm00001d041124	Unnamed__4	CTCC	748	4	-	Petroselinum hortense
Zm00001d041124	Unnamed__4	CTCC	755	4	-	Petroselinum hortense
Zm00001d041124	Unnamed__4	CTCC	766	4	-	Petroselinum hortense
Zm00001d041124	Unnamed__4	CTCC	799	4	-	Petroselinum hortense
Zm00001d041124	Unnamed__4	CTCC	820	4	-	Petroselinum hortense
Zm00001d041124	Unnamed__4	CTCC	889	4	-	Petroselinum hortense
Zm00001d041124	Unnamed__4	CTCC	902	4	-	Petroselinum hortense
Zm00001d041124	Unnamed__4	CTCC	959	4	+	Petroselinum hortense
Zm00001d041124	Unnamed__4	CTCC	1254	4	+	Petroselinum hortense
Zm00001d041124	Unnamed__4	CTCC	1409	4	+	Petroselinum hortense
Zm00001d041124		motif_sequence	16	4	+	organism	short_function
Zm00001d041124		motif_sequence	18	4	-	organism	short_function
Zm00001d041124		motif_sequence	151	4	-	organism	short_function
Zm00001d041124		motif_sequence	157	4	+	organism	short_function
Zm00001d041124		motif_sequence	194	4	-	organism	short_function
Zm00001d041124		motif_sequence	327	4	+	organism	short_function
Zm00001d041124		motif_sequence	548	4	+	organism	short_function
Zm00001d041124		motif_sequence	577	4	+	organism	short_function
Zm00001d041124		motif_sequence	676	4	+	organism	short_function
Zm00001d041124		motif_sequence	748	4	-	organism	short_function
Zm00001d041124		motif_sequence	778	4	-	organism	short_function
Zm00001d041124		motif_sequence	833	4	+	organism	short_function
Zm00001d041124		motif_sequence	889	4	-	organism	short_function
Zm00001d041124		motif_sequence	902	4	-	organism	short_function
Zm00001d041124		motif_sequence	1252	4	+	organism	short_function
Zm00001d041124		motif_sequence	1365	4	-	organism	short_function
Zm00001d041124		motif_sequence	1429	4	-	organism	short_function
Zm00001d041124	CGTCA-motif	CGTCA	962	5	+	Hordeum vulgare	cis-acting regulatory element involved in the MeJA-responsiveness
Zm00001d041124	RY-element	CATGCATG	914	8	-	Helianthus annuus	cis-acting regulatory element involved in seed-specific regulation
Zm00001d041124	I-box	GTATAAGGCC	264	9	-	Larix laricina	part of a light responsive element
Zm00001d041124	LTR	CCGAAA	77	6	+	Hordeum vulgare	cis-acting element involved in low-temperature responsiveness
Zm00001d041124	LTR	CCGAAA	302	6	+	Hordeum vulgare	cis-acting element involved in low-temperature responsiveness
Zm00001d041124	Myb	TAACTG	1307	6	+	Arabidopsis thaliana
Zm00001d041124	Myb	CAACTG	1360	6	-	Arabidopsis thaliana
Zm00001d046434	Unnamed__12	TCCACGTAGA	1084	9	+	Zea mays
Zm00001d046434	CAT-box	GCCACT	57	6	-	Arabidopsis thaliana	cis-acting regulatory element related to meristem expression
Zm00001d046434	CAT-box	GCCACT	97	6	+	Arabidopsis thaliana	cis-acting regulatory element related to meristem expression
Zm00001d046434	CAT-box	GCCACT	1319	6	+	Arabidopsis thaliana	cis-acting regulatory element related to meristem expression
Zm00001d046434	TGACG-motif	TGACG	837	5	+	Hordeum vulgare	cis-acting regulatory element involved in the MeJA-responsiveness
Zm00001d046434	TGACG-motif	TGACG	1201	5	+	Hordeum vulgare	cis-acting regulatory element involved in the MeJA-responsiveness
Zm00001d046434	MYB-like sequence	TAACCA	1274	6	+	Arabidopsis thaliana
Zm00001d046434	as-1	TGACG	837	5	+	Arabidopsis thaliana
Zm00001d046434	as-1	TGACG	1201	5	+	Arabidopsis thaliana
Zm00001d046434	GATA-motif	GATAGGG	403	7	+	Pisum sativum	part of a light responsive element
Zm00001d046434	Unnamed__1	CGTGG	1388	5	-	Zea mays
Zm00001d046434	Unnamed__14	TCCACGTAGA	1084	9	+	Zea mays
Zm00001d046434	MYB	CAACCA	554	6	-	Arabidopsis thaliana
Zm00001d046434	MYB	CAACAG	641	6	+	Arabidopsis thaliana
Zm00001d046434	MYB	TAACCA	1274	6	+	Arabidopsis thaliana
Zm00001d046434	MYB	CAACAG	1351	6	+	Arabidopsis thaliana
Zm00001d046434	WUN-motif	AAATTACT	212	8	-	Nicotiana glutinosa
Zm00001d046434	AT~TATA-box	TATATA	1218	6	-	Arabidopsis thaliana
Zm00001d046434	AAGAA-motif	gGTAAAGAAA	1167	9	+	Avena sativa
Zm00001d046434	Unnamed__10	TCCACGTAGA	1084	9	+	Zea mays
Zm00001d046434	Unnamed__8	TCCACGTAGA	1084	9	+	Zea mays
Zm00001d046434	Myb	TAACTG	1354	6	-	Arabidopsis thaliana
Zm00001d046434	WRE3	CCACCT	1410	6	-	Pisum sativum
Zm00001d046434	CGTCA-motif	CGTCA	837	5	-	Hordeum vulgare	cis-acting regulatory element involved in the MeJA-responsiveness
Zm00001d046434	CGTCA-motif	CGTCA	1201	5	-	Hordeum vulgare	cis-acting regulatory element involved in the MeJA-responsiveness
Zm00001d046434		motif_sequence	439	4	+	organism	short_function
Zm00001d046434		motif_sequence	486	4	+	organism	short_function
Zm00001d046434		motif_sequence	569	4	+	organism	short_function
Zm00001d046434		motif_sequence	599	4	-	organism	short_function
Zm00001d046434		motif_sequence	725	4	+	organism	short_function
Zm00001d046434		motif_sequence	773	4	-	organism	short_function
Zm00001d046434		motif_sequence	793	4	-	organism	short_function
Zm00001d046434		motif_sequence	812	4	+	organism	short_function
Zm00001d046434		motif_sequence	866	4	+	organism	short_function
Zm00001d046434		motif_sequence	955	4	-	organism	short_function
Zm00001d046434		motif_sequence	1019	4	+	organism	short_function
Zm00001d046434		motif_sequence	1089	4	-	organism	short_function
Zm00001d046434		motif_sequence	1183	4	-	organism	short_function
Zm00001d046434		motif_sequence	1228	4	-	organism	short_function
Zm00001d046434		motif_sequence	1370	4	+	organism	short_function
Zm00001d046434		motif_sequence	1403	4	-	organism	short_function
Zm00001d046434	Box 4	ATTAAT	356	6	+	Petroselinum crispum	part of a conserved DNA module involved in light responsiveness
Zm00001d046434	Box 4	ATTAAT	1260	6	-	Petroselinum crispum	part of a conserved DNA module involved in light responsiveness
Zm00001d046434	Unnamed__4	CTCC	247	4	-	Petroselinum hortense
Zm00001d046434	Unnamed__4	CTCC	571	4	+	Petroselinum hortense
Zm00001d046434	Unnamed__4	CTCC	637	4	-	Petroselinum hortense
Zm00001d046434	Unnamed__4	CTCC	651	4	+	Petroselinum hortense
Zm00001d046434	Unnamed__4	CTCC	773	4	-	Petroselinum hortense
Zm00001d046434	Unnamed__4	CTCC	814	4	+	Petroselinum hortense
Zm00001d046434	Unnamed__4	CTCC	955	4	-	Petroselinum hortense
Zm00001d046434	Unnamed__4	CTCC	1030	4	-	Petroselinum hortense
Zm00001d046434	Unnamed__4	CTCC	1153	4	+	Petroselinum hortense
Zm00001d046434	Unnamed__4	CTCC	1228	4	-	Petroselinum hortense
Zm00001d046434	Unnamed__4	CTCC	1408	4	-	Petroselinum hortense
Zm00001d046434	Unnamed__4	CTCC	1421	4	-	Petroselinum hortense
Zm00001d046434	Unnamed__4	CTCC	1424	4	-	Petroselinum hortense
Zm00001d046434	MYC	CATGTG	331	6	+	Arabidopsis thaliana
Zm00001d046434	MYC	CATTTG	574	6	+	Arabidopsis thaliana
Zm00001d046434	MYC	CATTTG	707	6	+	Arabidopsis thaliana
Zm00001d046434	MYC	CATGTG	881	6	-	Arabidopsis thaliana
Zm00001d046434	MYC	CATTTG	985	6	+	Arabidopsis thaliana
Zm00001d046434	TC-rich repeats	GTTTTCTTAC	760	9	+	Nicotiana tabacum	cis-acting element involved in defense and stress responsiveness
Zm00001d046434	TC-rich repeats	GTTTTCTTAC	1168	9	-	Nicotiana tabacum	cis-acting element involved in defense and stress responsiveness
Zm00001d046434	GARE-motif	TCTGTTG	641	7	-	Brassica oleracea	gibberellin-responsive element
Zm00001d046434	GC-motif	CCCCCG	1477	6	-	Zea mays	enhancer-like element involved in anoxic specific inducibility
Zm00001d046434	ABRE	ACGTG	660	5	+	Arabidopsis thaliana	cis-acting element involved in the abscisic acid responsiveness
Zm00001d046434	Myb-binding site	CAACAG	641	6	+	Nicotiana tabacum
Zm00001d046434	Myb-binding site	CAACAG	1351	6	+	Nicotiana tabacum
Zm00001d046434	Unnamed__2	CCCCGG	390	6	+	Zea mays
Zm00001d046434	L-box	ATCCCACCTAC	1408	10	-	Petroselinum crispum	part of a light responsive element
Zm00001d046434	TATA-box	ATTATA	41	6	+	Brassica napus	core promoter element around -30 of transcription start
Zm00001d046434	TATA-box	TATAA	42	5	-	Arabidopsis thaliana	core promoter element around -30 of transcription start
Zm00001d046434	TATA-box	TATA	43	4	+	Arabidopsis thaliana	core promoter element around -30 of transcription start
Zm00001d046434	TATA-box	TATAA	102	5	-	Arabidopsis thaliana	core promoter element around -30 of transcription start
Zm00001d046434	TATA-box	TATA	103	4	+	Arabidopsis thaliana	core promoter element around -30 of transcription start
Zm00001d046434	TATA-box	TATA	112	4	+	Arabidopsis thaliana	core promoter element around -30 of transcription start
Zm00001d046434	TATA-box	ATATAA	166	6	+	Brassica oleracea	core promoter element around -30 of transcription start
Zm00001d046434	TATA-box	TATA	167	4	+	Arabidopsis thaliana	core promoter element around -30 of transcription start
Zm00001d046434	TATA-box	ATATAA	548	6	+	Brassica oleracea	core promoter element around -30 of transcription start
Zm00001d046434	TATA-box	TATA	549	4	+	Arabidopsis thaliana	core promoter element around -30 of transcription start
Zm00001d046434	TATA-box	TATATA	1218	6	-	Arabidopsis thaliana	core promoter element around -30 of transcription start
Zm00001d046434	TATA-box	ATATAA	1219	6	+	Brassica oleracea	core promoter element around -30 of transcription start
Zm00001d046434	TATA-box	TATA	1220	4	-	Arabidopsis thaliana	core promoter element around -30 of transcription start
Zm00001d046434	G-Box	CACGTT	659	6	-	Pisum sativum	cis-acting regulatory element involved in light responsiveness
Zm00001d046434	STRE	AGGGG	476	5	+	Arabidopsis thaliana
Zm00001d046434	STRE	AGGGG	1225	5	+	Arabidopsis thaliana
Zm00001d046434	CAAT-box	CCAAT	38	5	+	Arabidopsis thaliana	common cis-acting element in promoter and enhancer regions
Zm00001d046434	CAAT-box	CAAT	39	4	+	Nicotiana glutinosa
Zm00001d046434	CAAT-box	CCAAT	71	5	-	Arabidopsis thaliana	common cis-acting element in promoter and enhancer regions
Zm00001d046434	CAAT-box	CAAT	94	4	-	Nicotiana glutinosa
Zm00001d046434	CAAT-box	CAAAT	153	5	+	Pisum sativum	common cis-acting element in promoter and enhancer regions
Zm00001d046434	CAAT-box	CAAT	164	4	+	Nicotiana glutinosa
Zm00001d046434	CAAT-box	CAAAT	318	5	+	Pisum sativum	common cis-acting element in promoter and enhancer regions
Zm00001d046434	CAAT-box	CAAAT	321	5	-	Pisum sativum	common cis-acting element in promoter and enhancer regions
Zm00001d046434	CAAT-box	CAAAT	340	5	+	Pisum sativum	common cis-acting element in promoter and enhancer regions
Zm00001d046434	CAAT-box	CAAAT	343	5	-	Pisum sativum	common cis-acting element in promoter and enhancer regions
Zm00001d046434	CAAT-box	CAAAT	515	5	-	Pisum sativum	common cis-acting element in promoter and enhancer regions
Zm00001d046434	CAAT-box	CAAT	541	4	+	Nicotiana glutinosa
Zm00001d046434	CAAT-box	CAAAT	575	5	-	Pisum sativum	common cis-acting element in promoter and enhancer regions
Zm00001d046434	CAAT-box	CAAT	676	4	-	Nicotiana glutinosa
Zm00001d046434	CAAT-box	CCAAT	693	5	+	Arabidopsis thaliana	common cis-acting element in promoter and enhancer regions
Zm00001d046434	CAAT-box	CAAT	694	4	+	Nicotiana glutinosa
Zm00001d046434	CAAT-box	CAAAT	708	5	-	Pisum sativum	common cis-acting element in promoter and enhancer regions
Zm00001d046434	CAAT-box	CCAAT	745	5	-	Arabidopsis thaliana	common cis-acting element in promoter and enhancer regions
Zm00001d046434	CAAT-box	CCAAT	770	5	-	Arabidopsis thaliana	common cis-acting element in promoter and enhancer regions
Zm00001d046434	CAAT-box	CAAAT	777	5	-	Pisum sativum	common cis-acting element in promoter and enhancer regions
Zm00001d046434	CAAT-box	CAAT	897	4	-	Nicotiana glutinosa
Zm00001d046434	CAAT-box	CAAT	946	4	-	Nicotiana glutinosa
Zm00001d046434	CAAT-box	CAAAT	986	5	-	Pisum sativum	common cis-acting element in promoter and enhancer regions
Zm00001d046434	CAAT-box	CAAAT	1111	5	-	Pisum sativum	common cis-acting element in promoter and enhancer regions
Zm00001d046434	CAAT-box	CAAAT	1198	5	-	Pisum sativum	common cis-acting element in promoter and enhancer regions
Zm00001d046434	CAAT-box	CAAAT	1245	5	+	Pisum sativum	common cis-acting element in promoter and enhancer regions
Zm00001d046434	CAAT-box	CCAAT	1277	5	+	Arabidopsis thaliana	common cis-acting element in promoter and enhancer regions
Zm00001d046434	CAAT-box	CAAT	1278	4	+	Nicotiana glutinosa
Zm00001d046434	CAAT-box	CAAAT	1375	5	+	Pisum sativum	common cis-acting element in promoter and enhancer regions
Zm00001d048531	P-box	CCTTTTG	1351	7	+	Oryza sativa	gibberellin-responsive element
Zm00001d048531	TGA-element	AACGAC	1082	6	+	Brassica oleracea	auxin-responsive element
Zm00001d048531	ABRE	ACGTG	356	5	+	Arabidopsis thaliana	cis-acting element involved in the abscisic acid responsiveness
Zm00001d048531	LAMP-element	CTTTATCA	999	8	-	Pisum sativum	part of a light responsive element
Zm00001d048531	DRE	TACCGACAT	859	9	-	Arabidopsis thaliana	cis-acting element involved in dehydration, low-temp, salt stresses Zm00001d048531_T001 ABRE3a TACGTG 355 6 + Zea mays Zm00001d048531_T001 CAAT-box CCAAT 95 5 - Arabidopsis thaliana common cis-acting element in promoter and enhancer regions Zm00001d048531_T001 CAAT-box CAAT 208 4 - Nicotiana glutinosa Zm00001d048531_T001 CAAT-box CCAAT 252 5 + Arabidopsis thaliana common cis-acting element in pro…
